# Supplementary material for: Synthesis and Single Crystal Structures of Substituted-1,3-Selenazol-2-amines
Source: PubMed Central journal article supplement (PMC6155636; doi:10.3390/molecules22010046), 2016-12-29

# Supplementary Materials: Synthesis and Single Crystal Structures of Substituted-1,3-Selenazol-2-amines

Guoxiong Hua, Junyi Du, Alexandra M. Z. Slawin and J. Derek Woollins

$^1\text{H}$ -,  $^{13}\text{C}$ -NMR Spectra of Compounds 5–16.

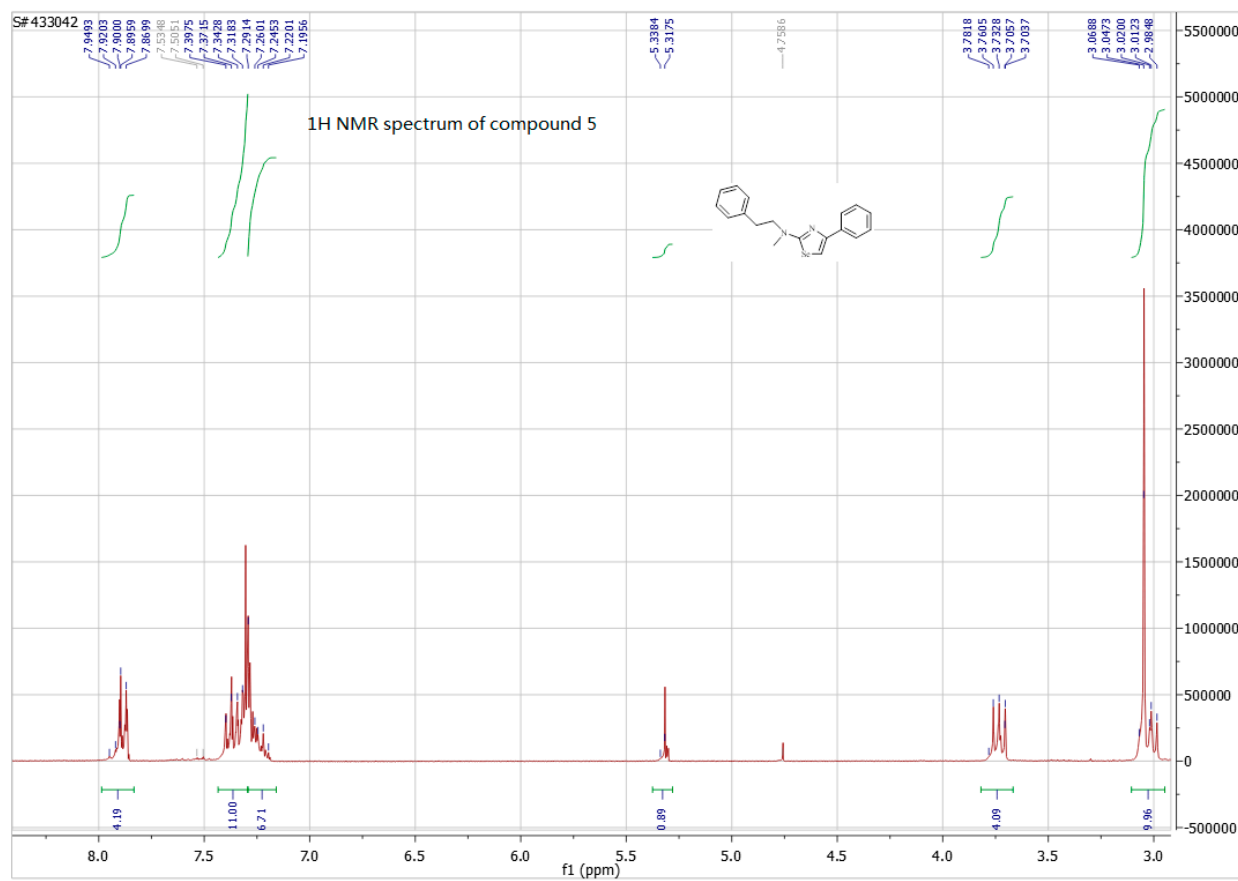

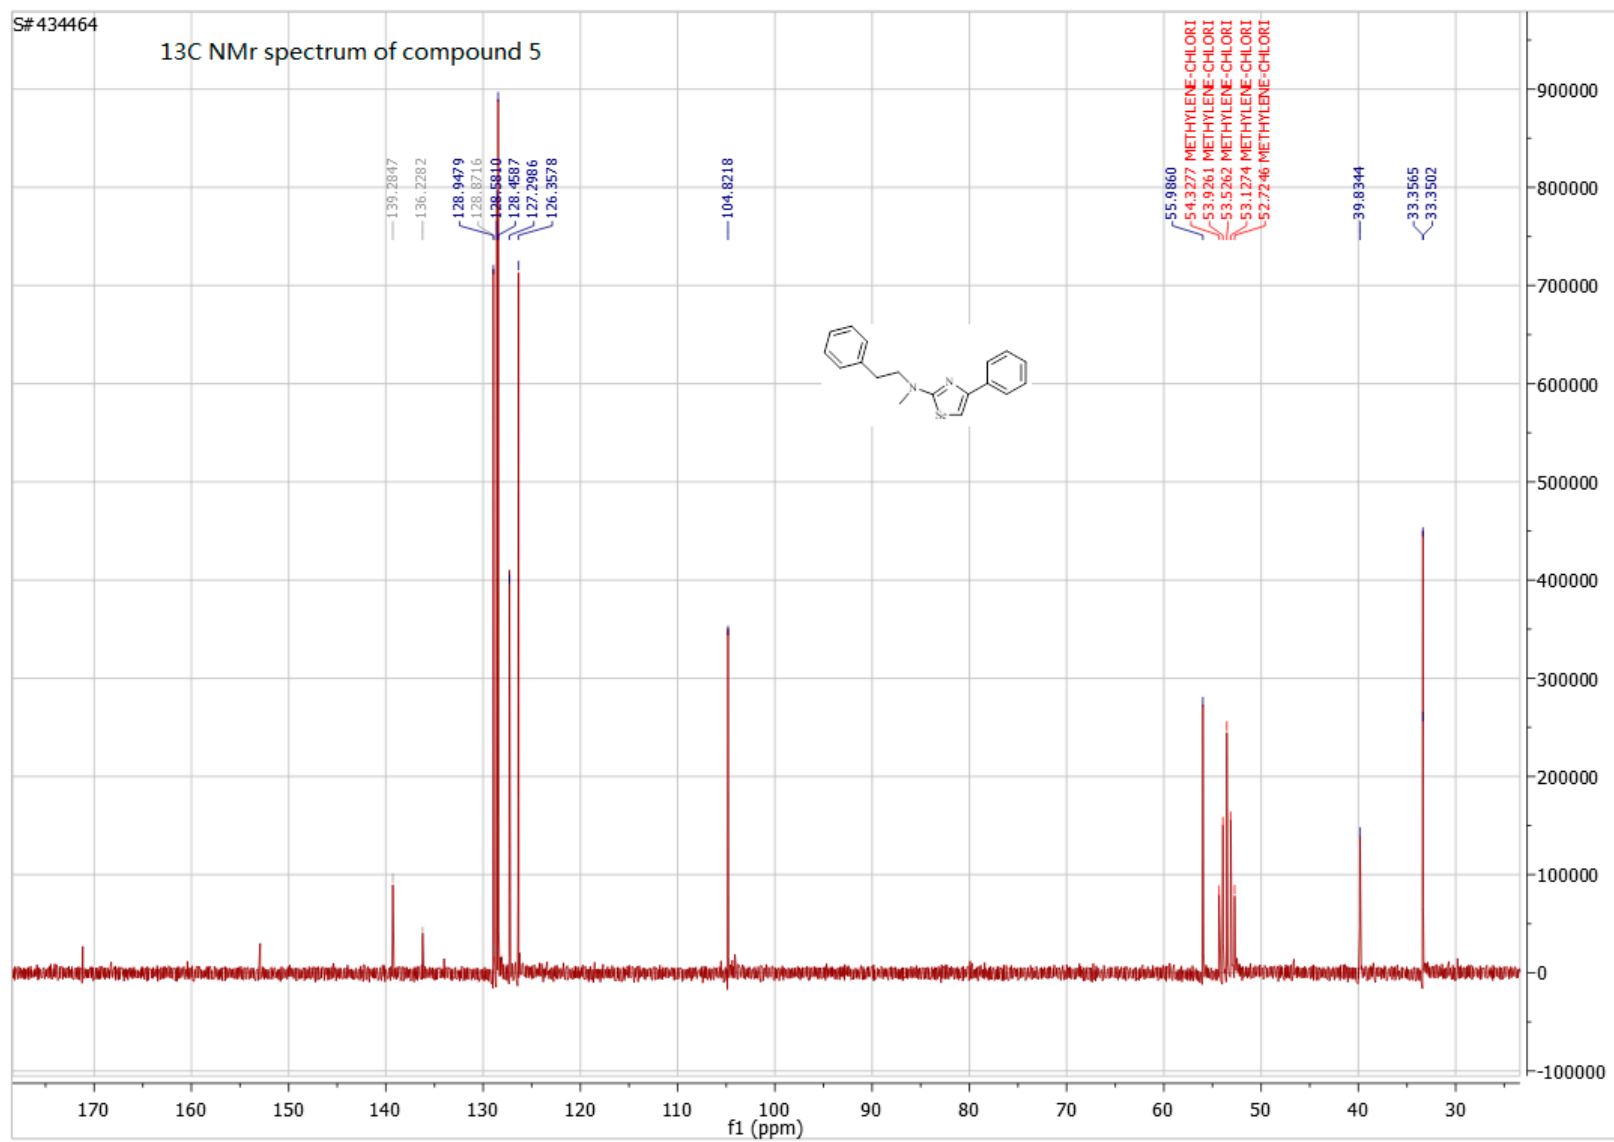

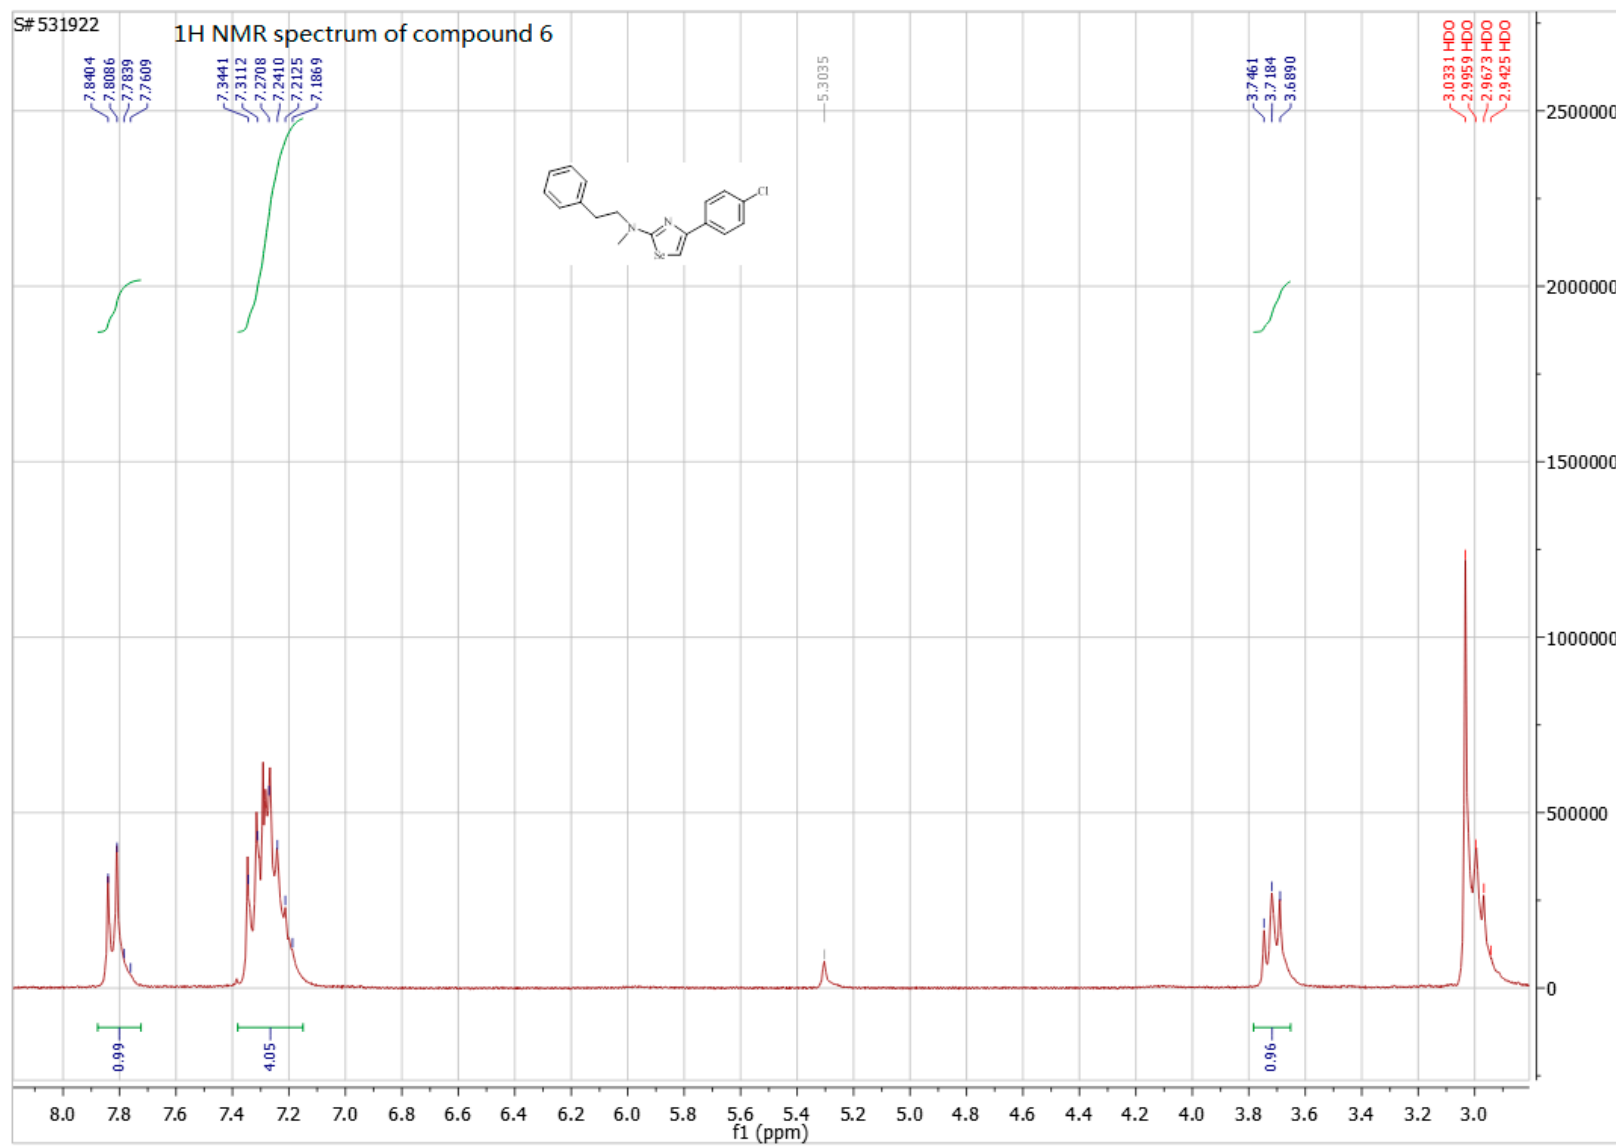

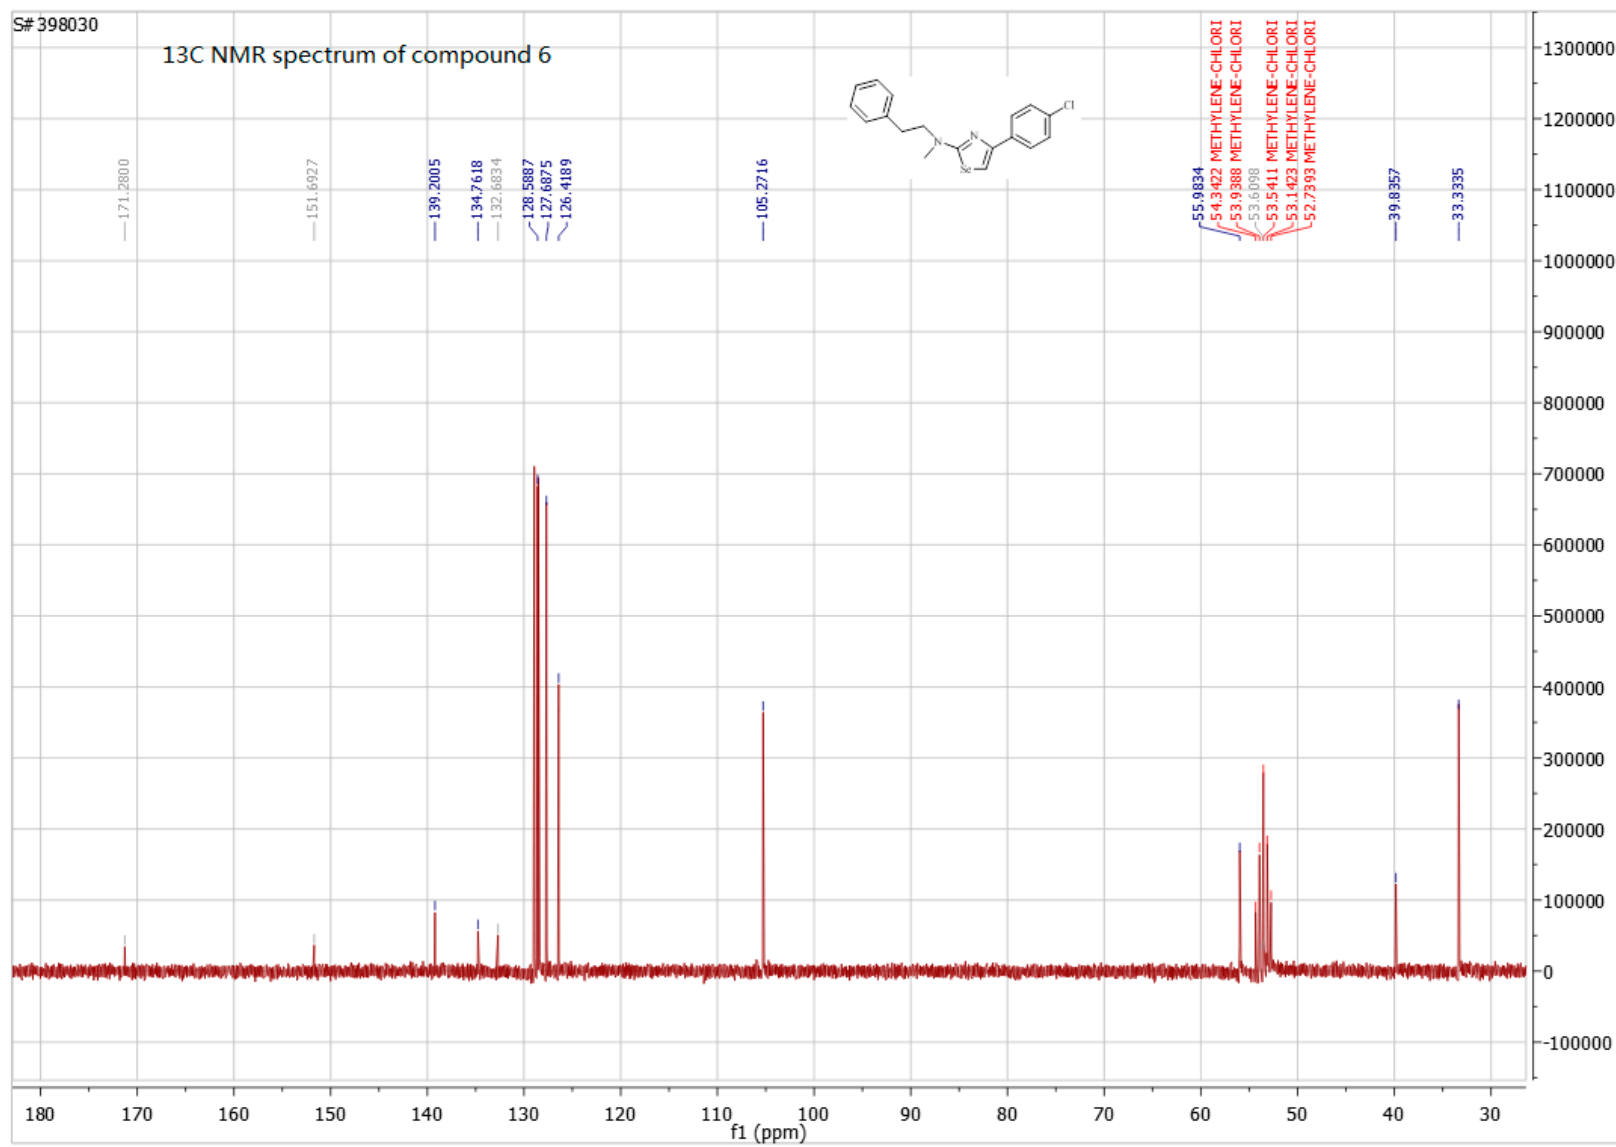

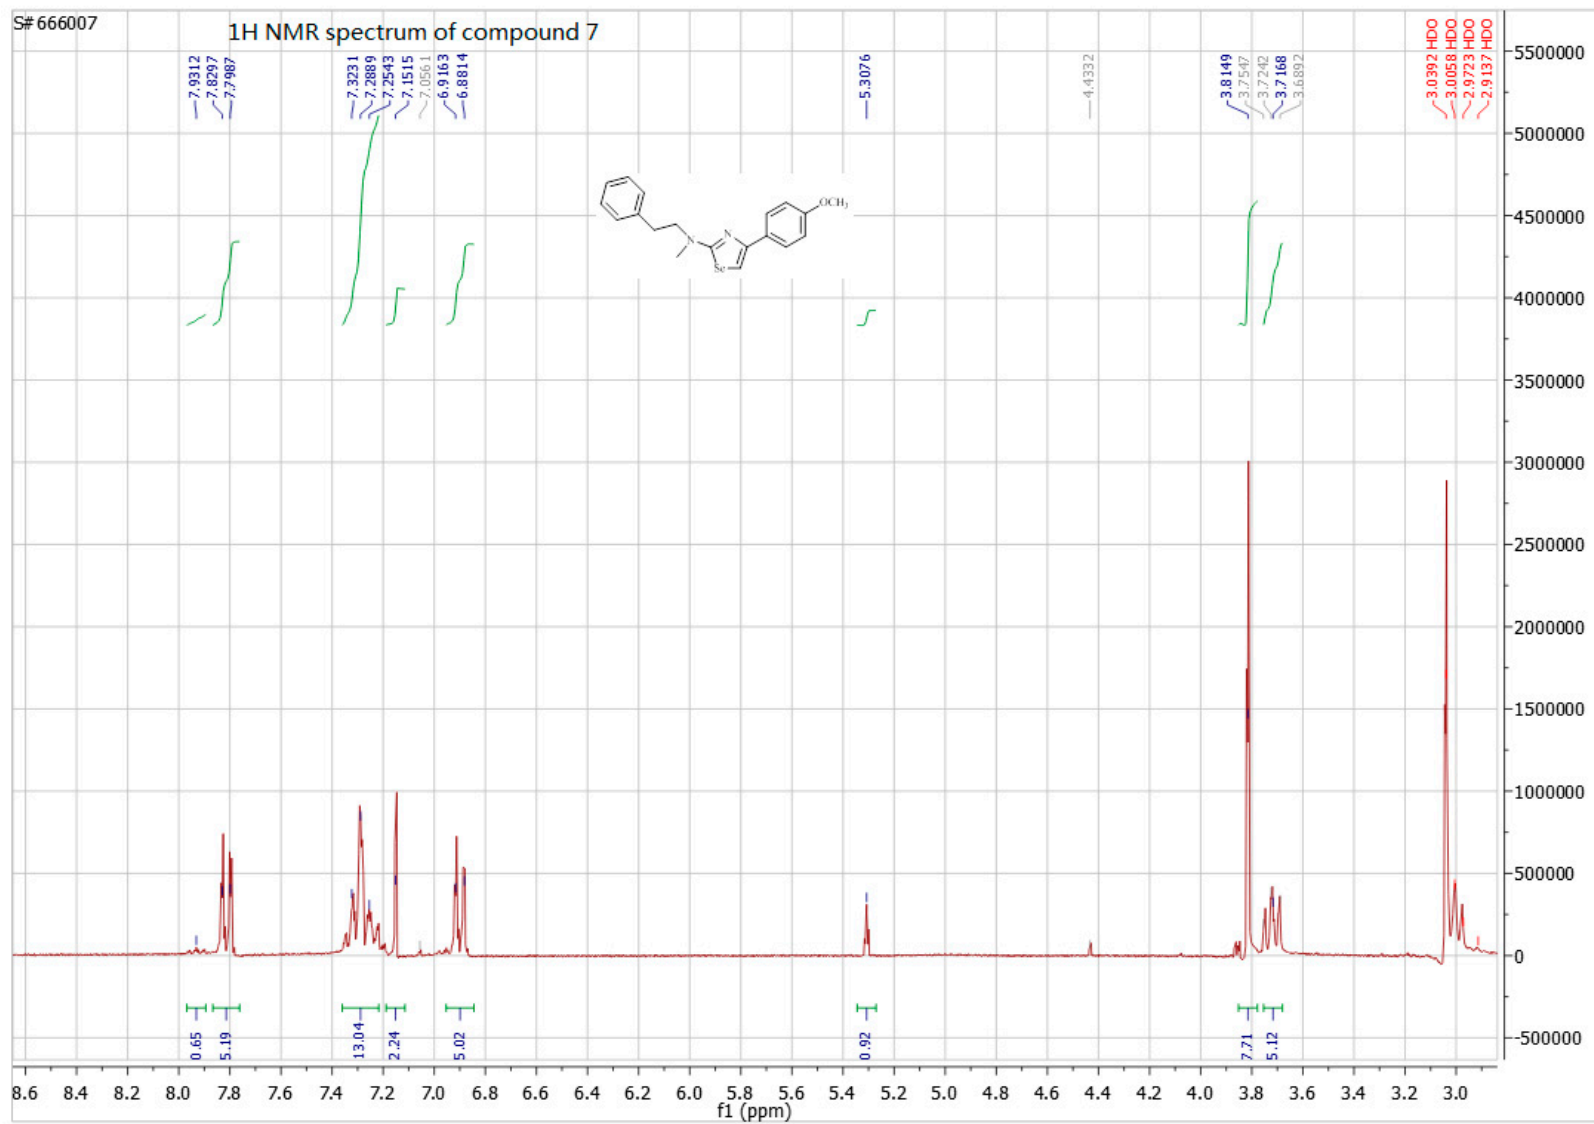

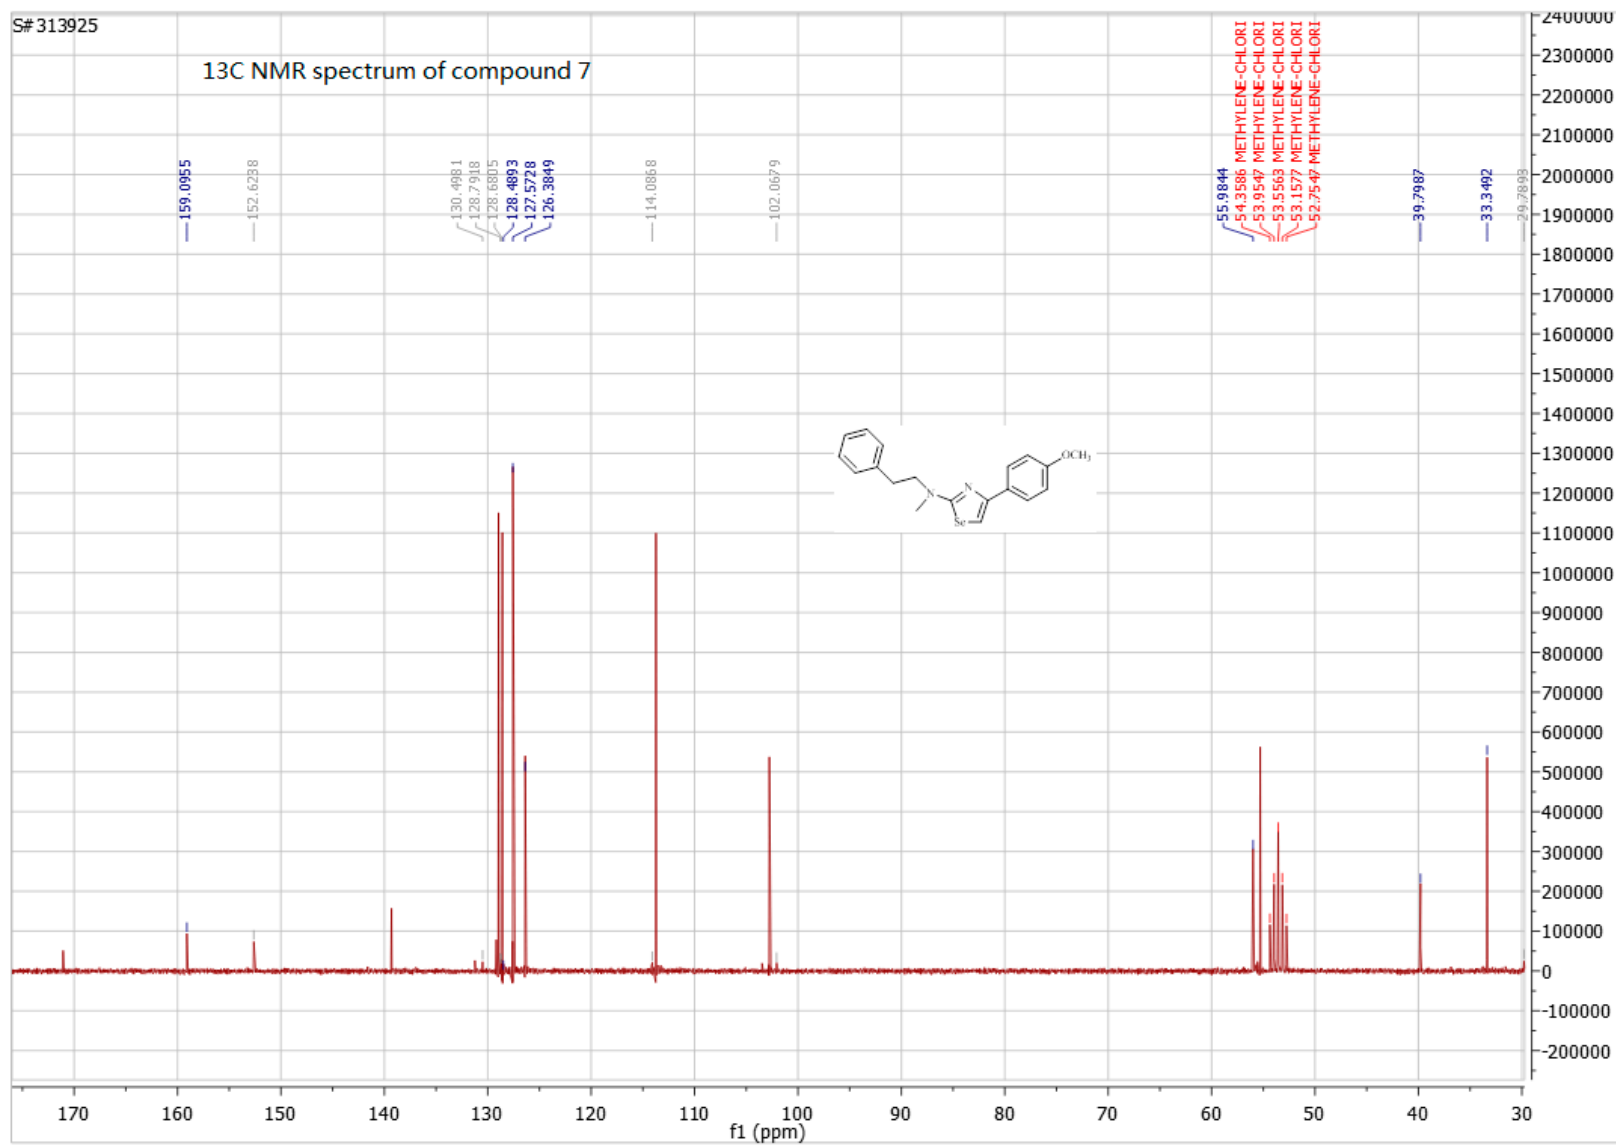

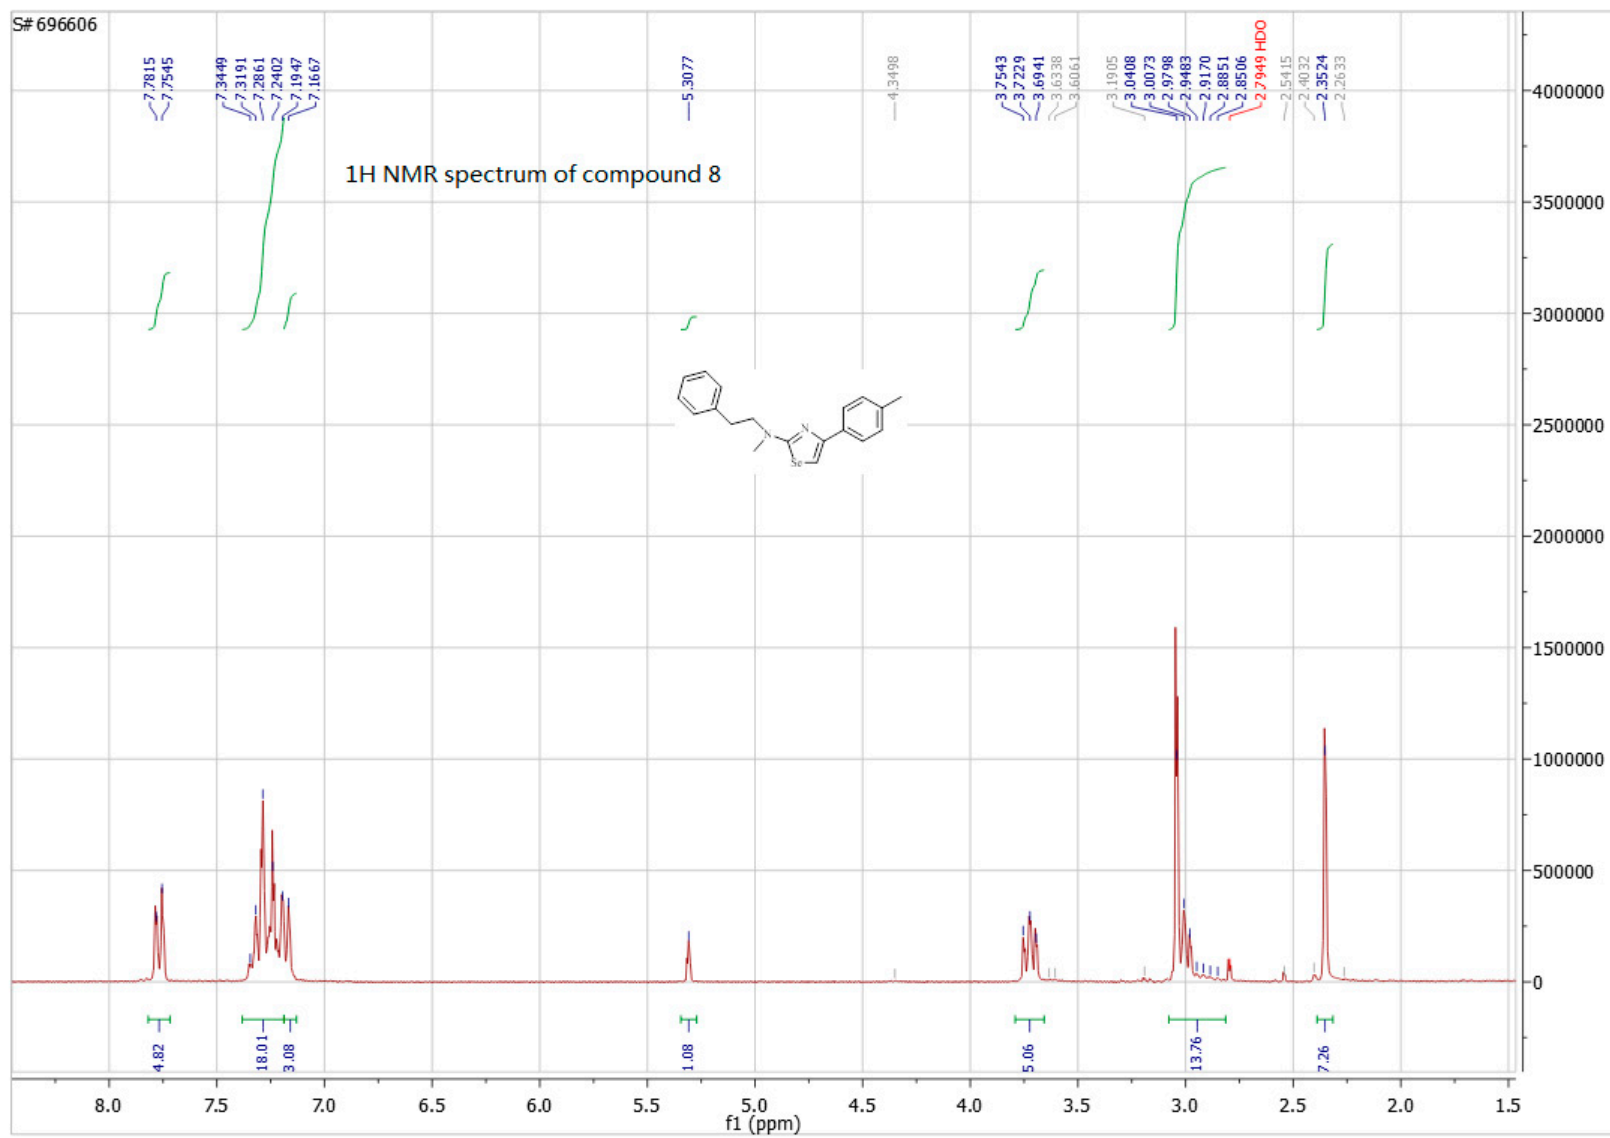

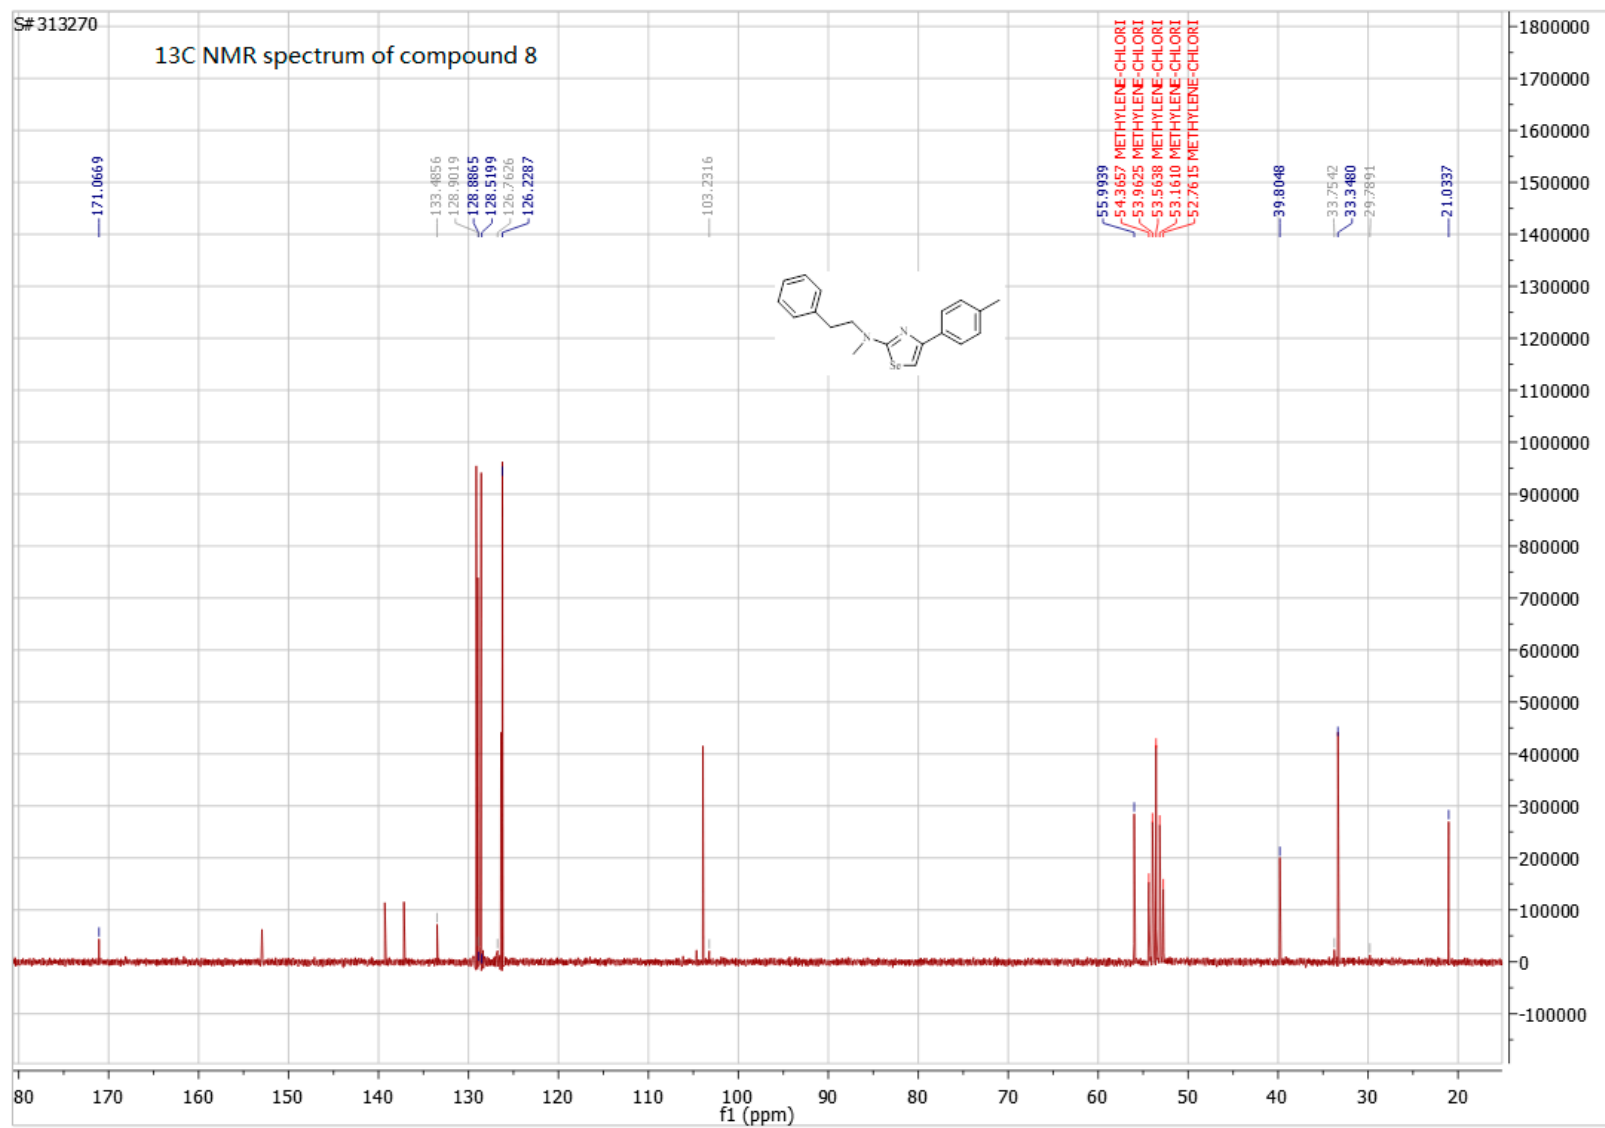



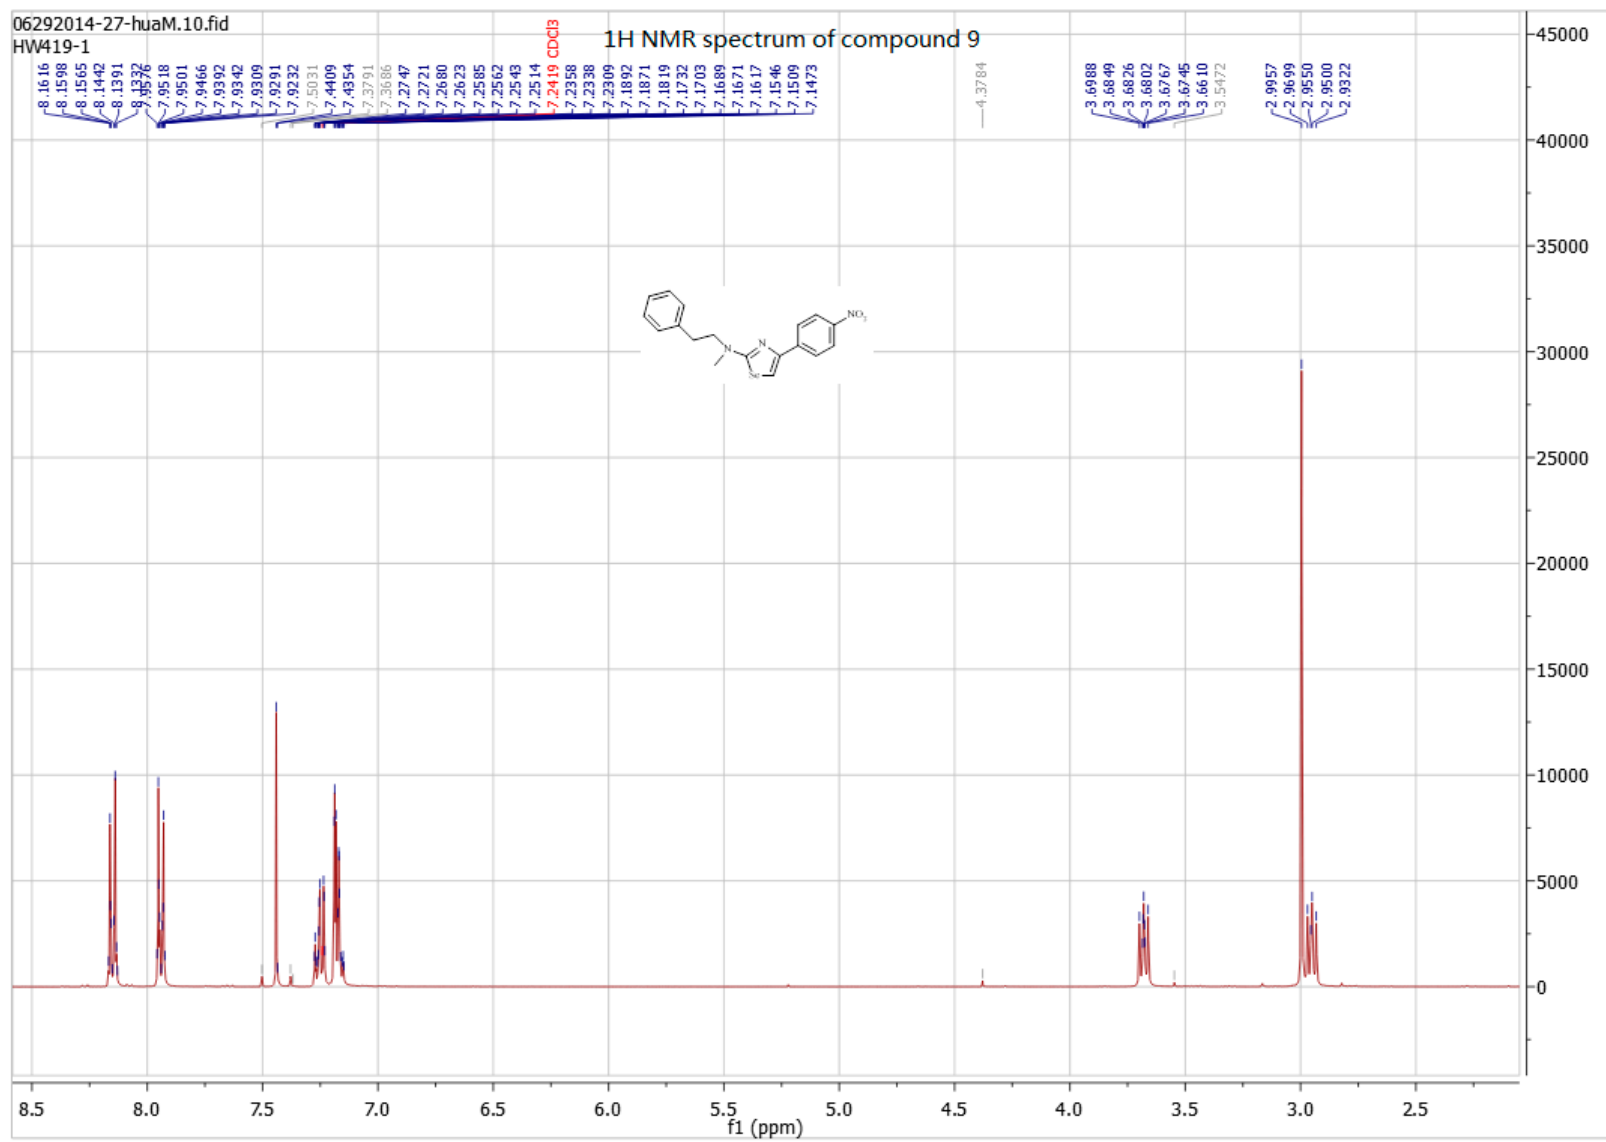

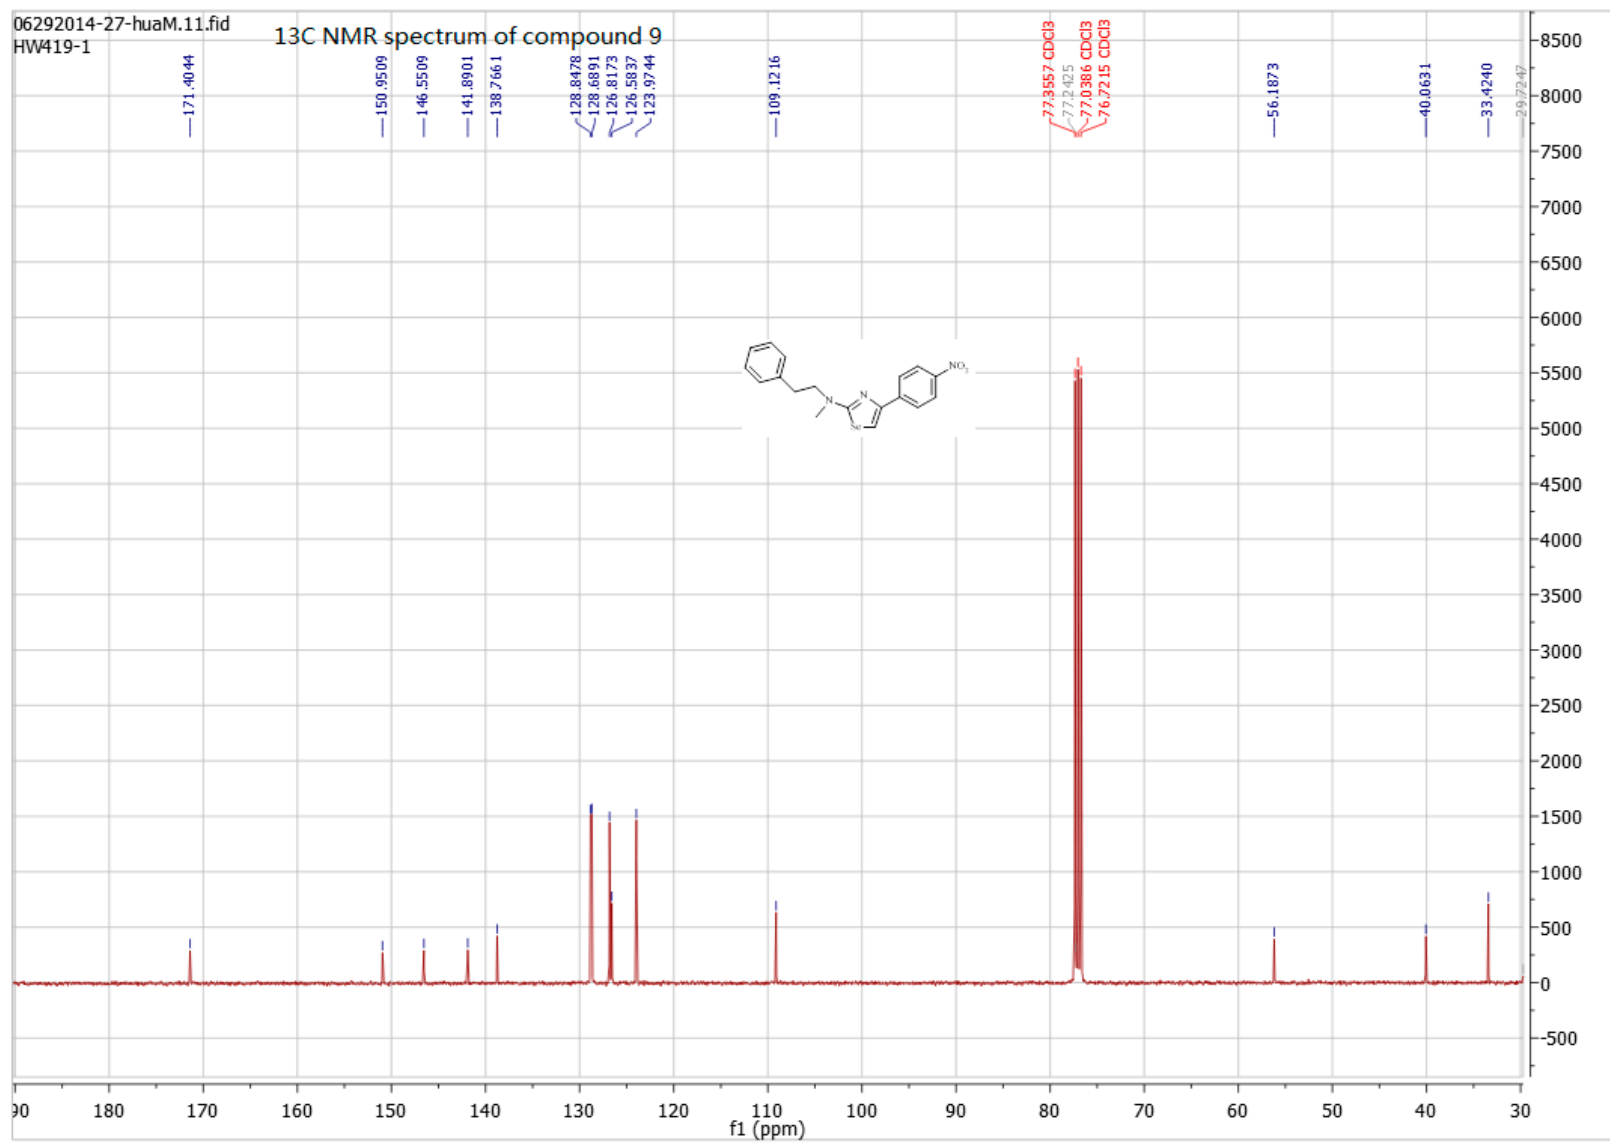

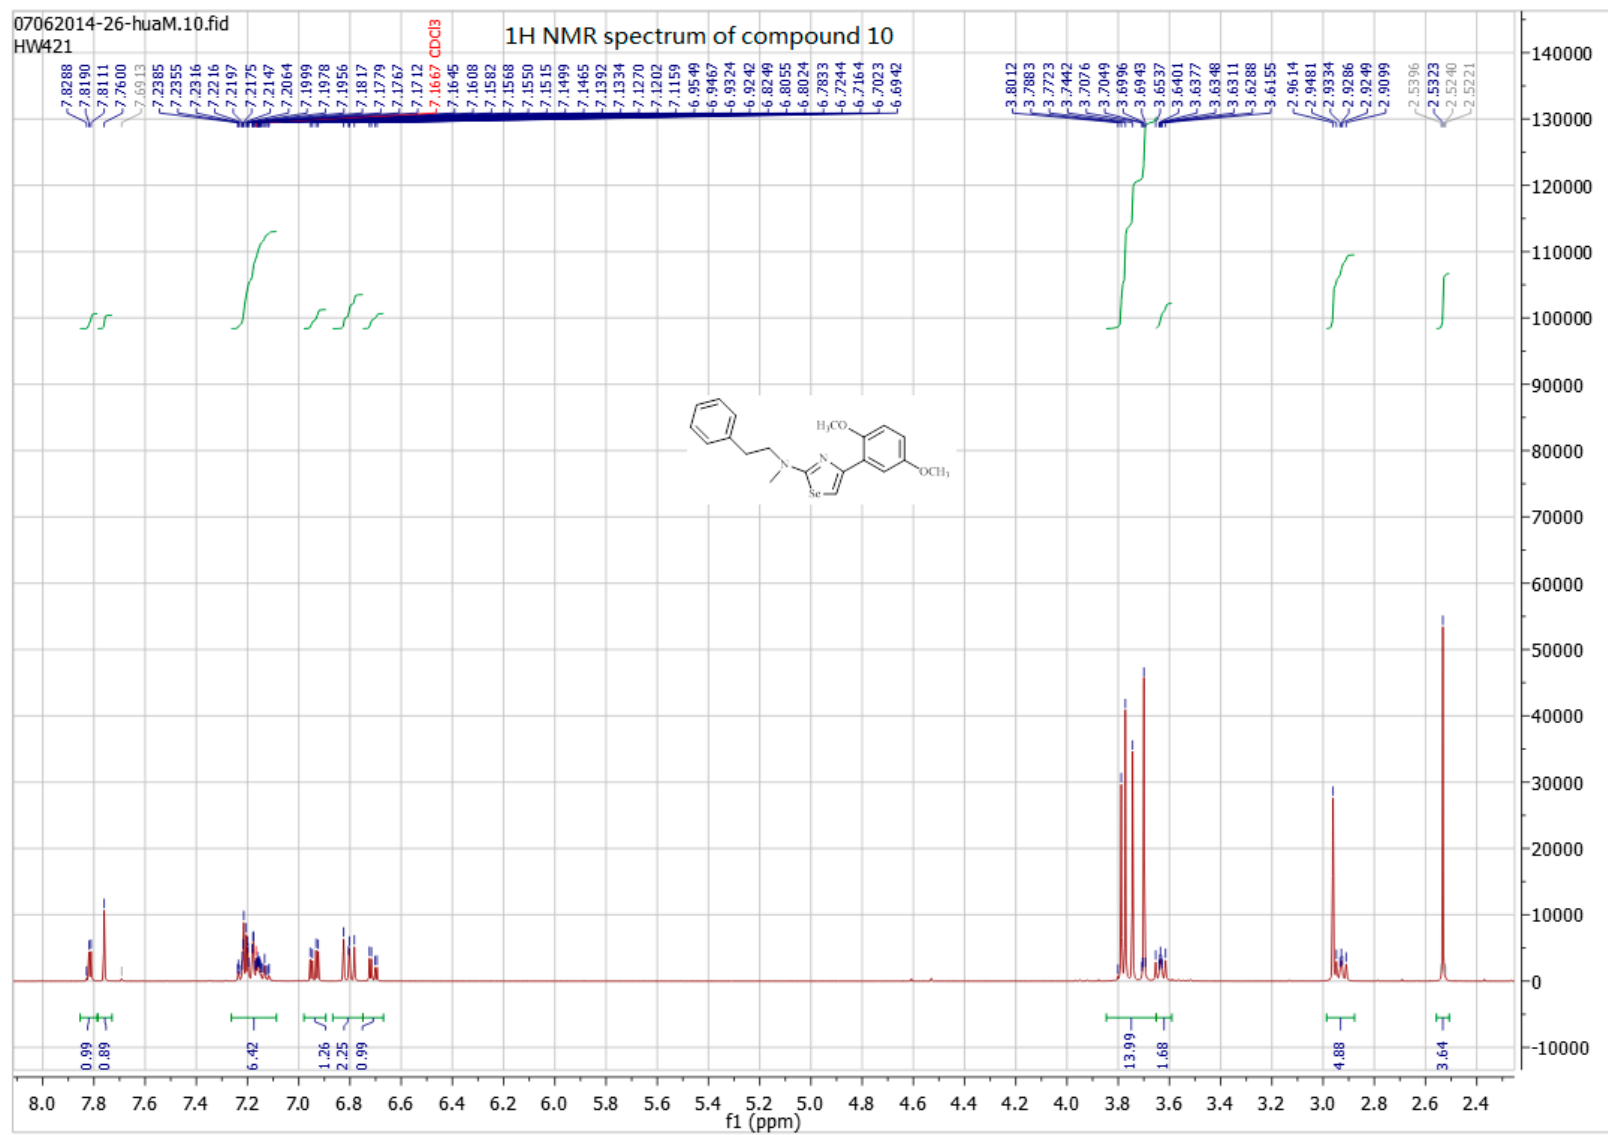

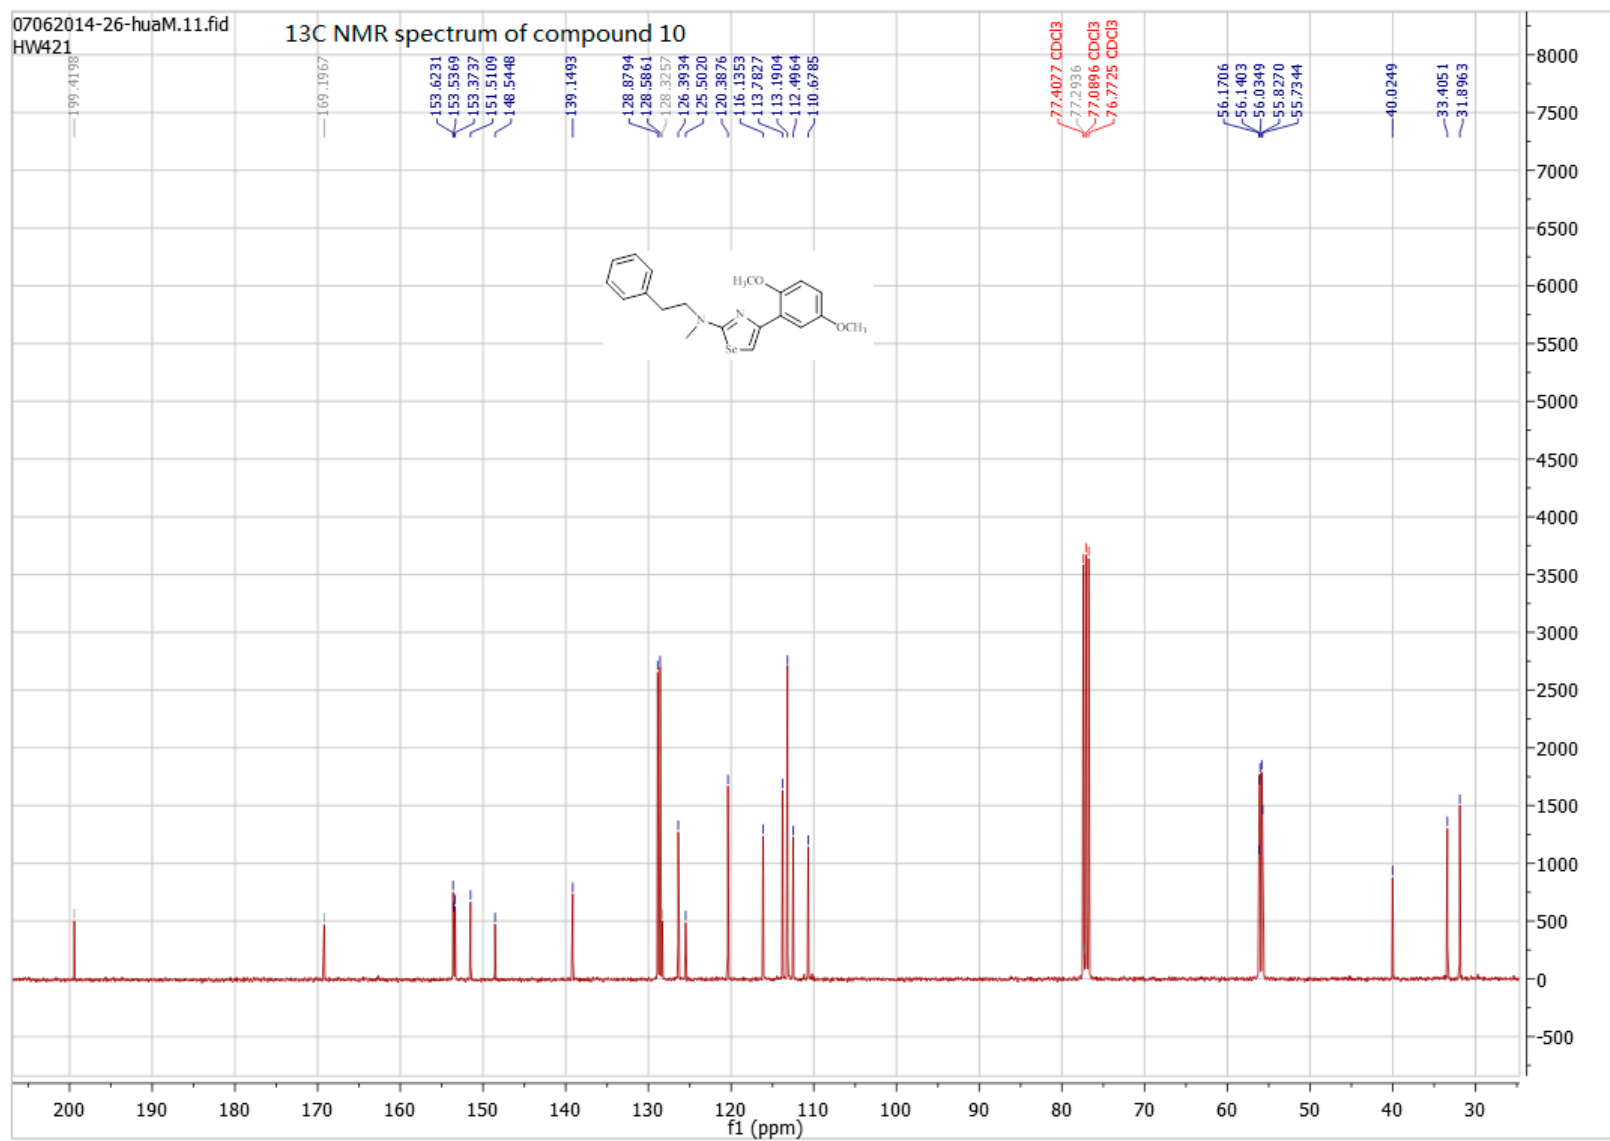

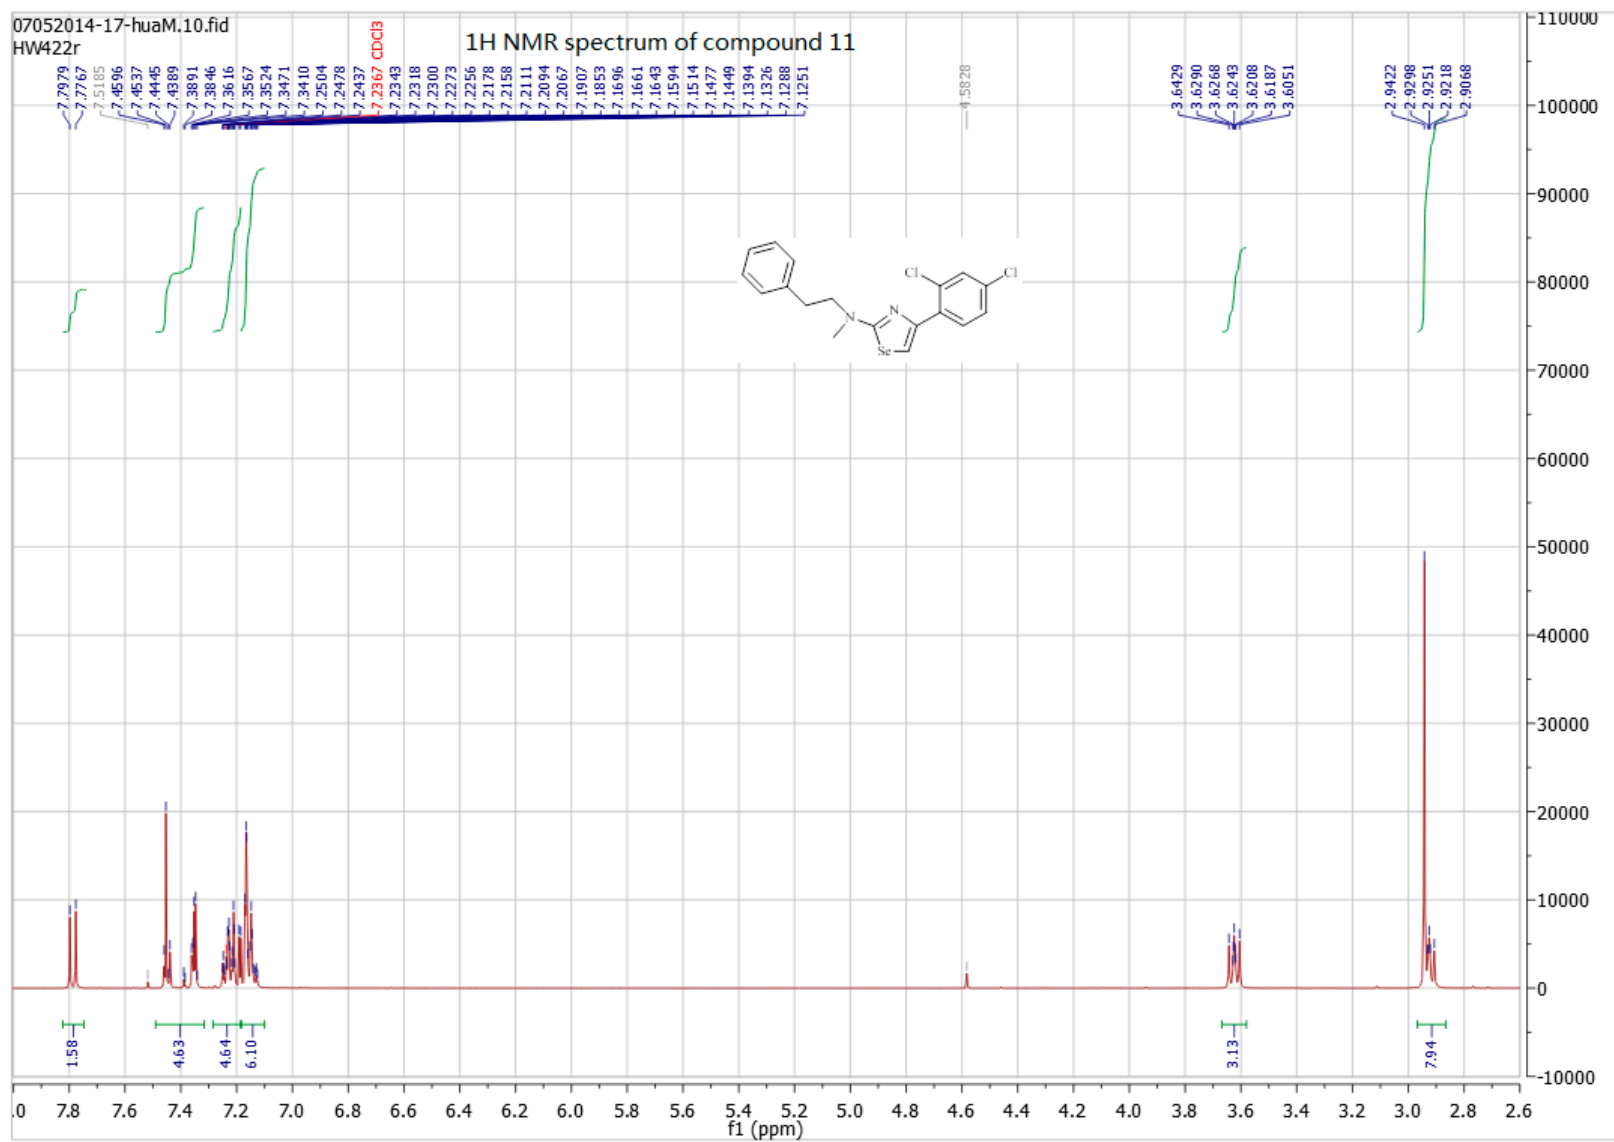

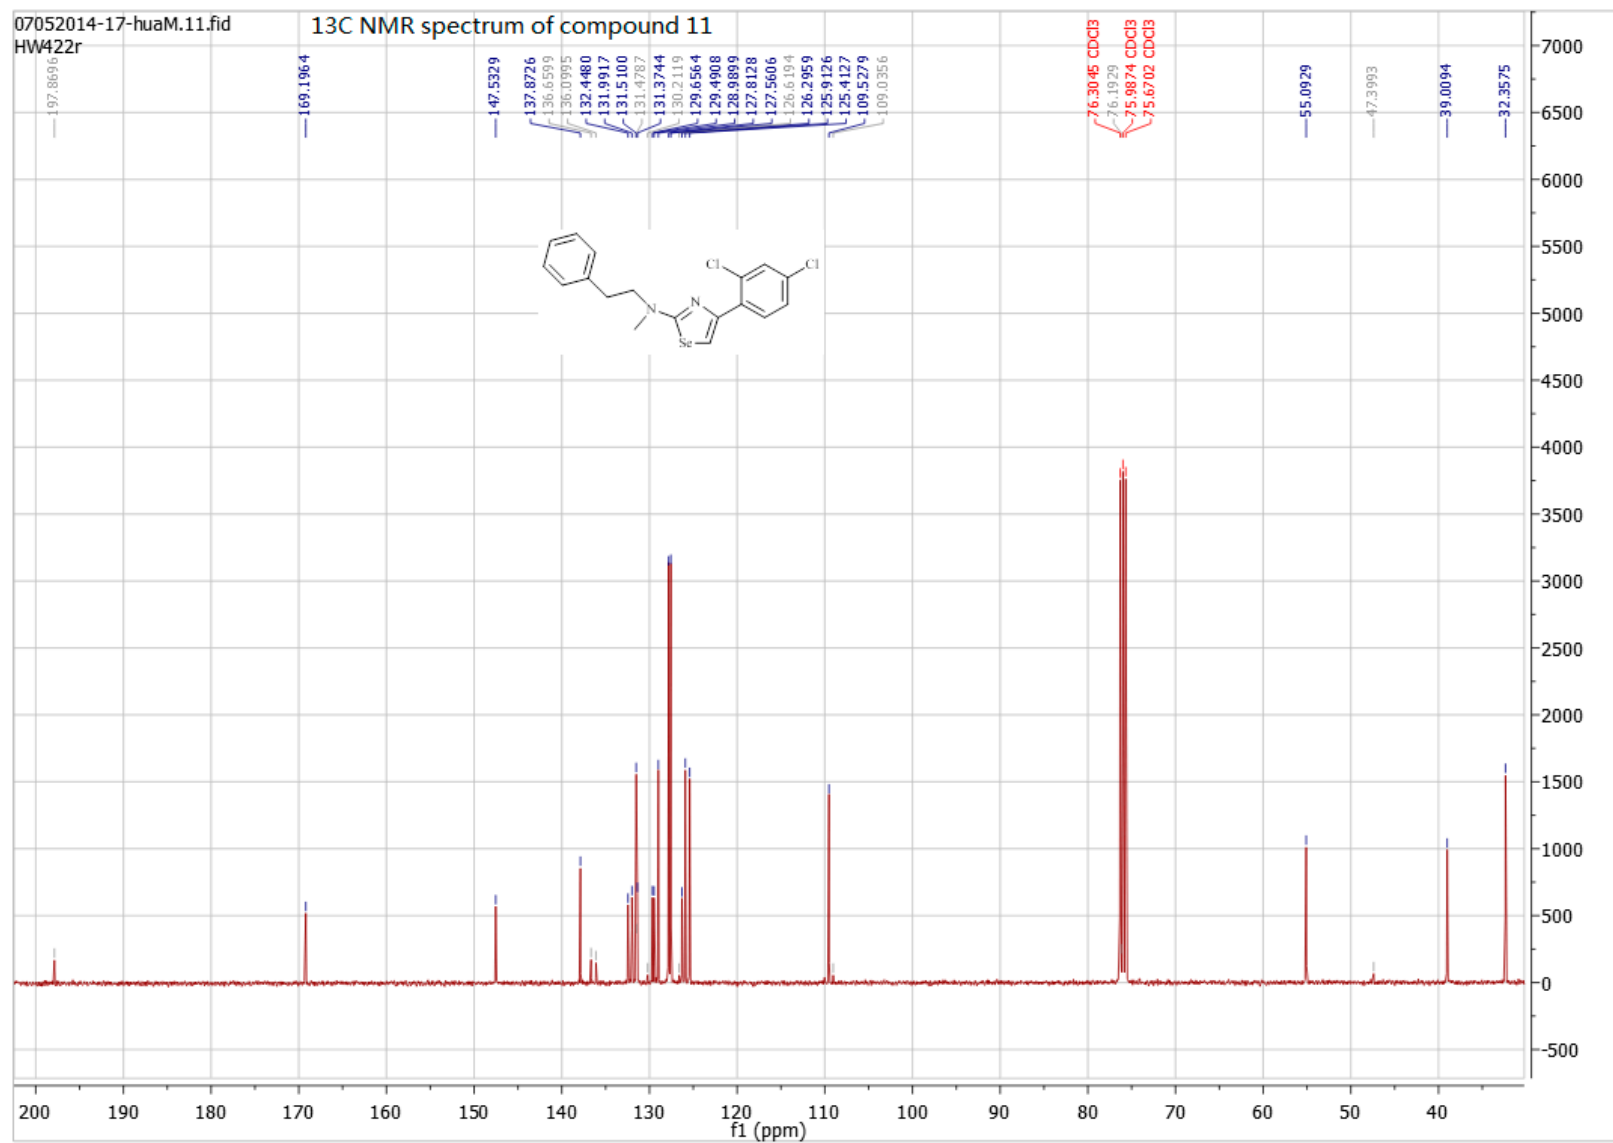

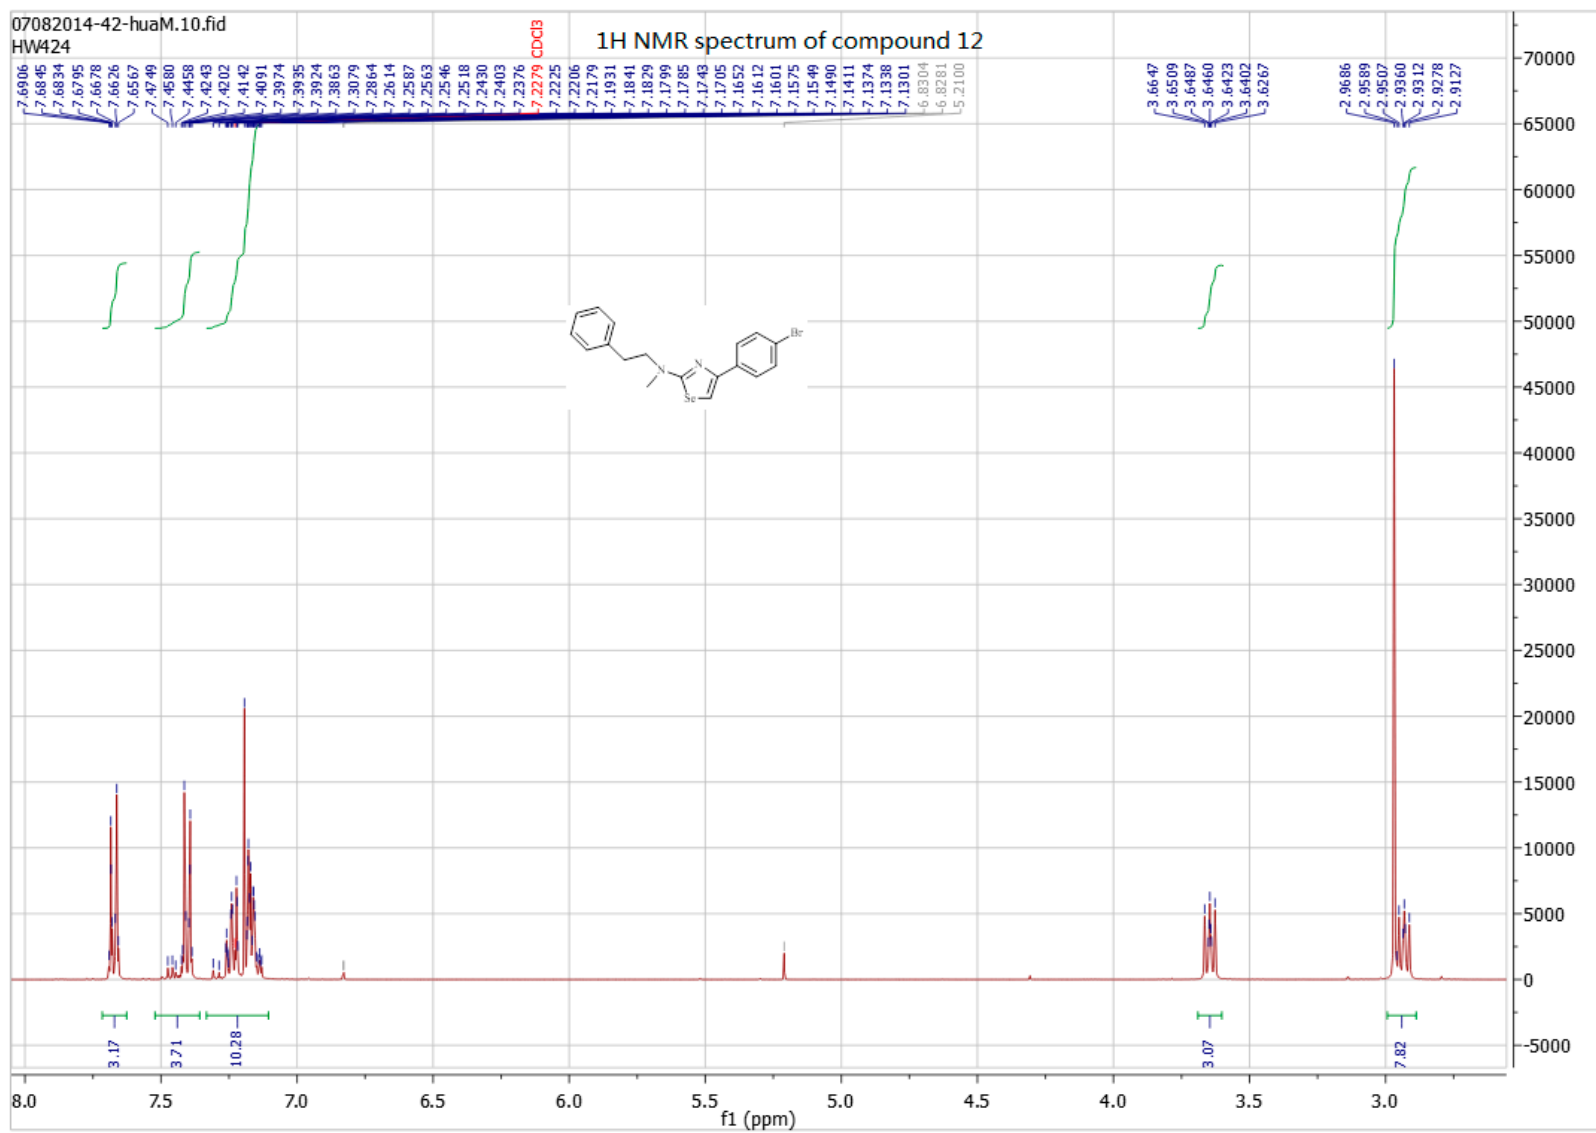

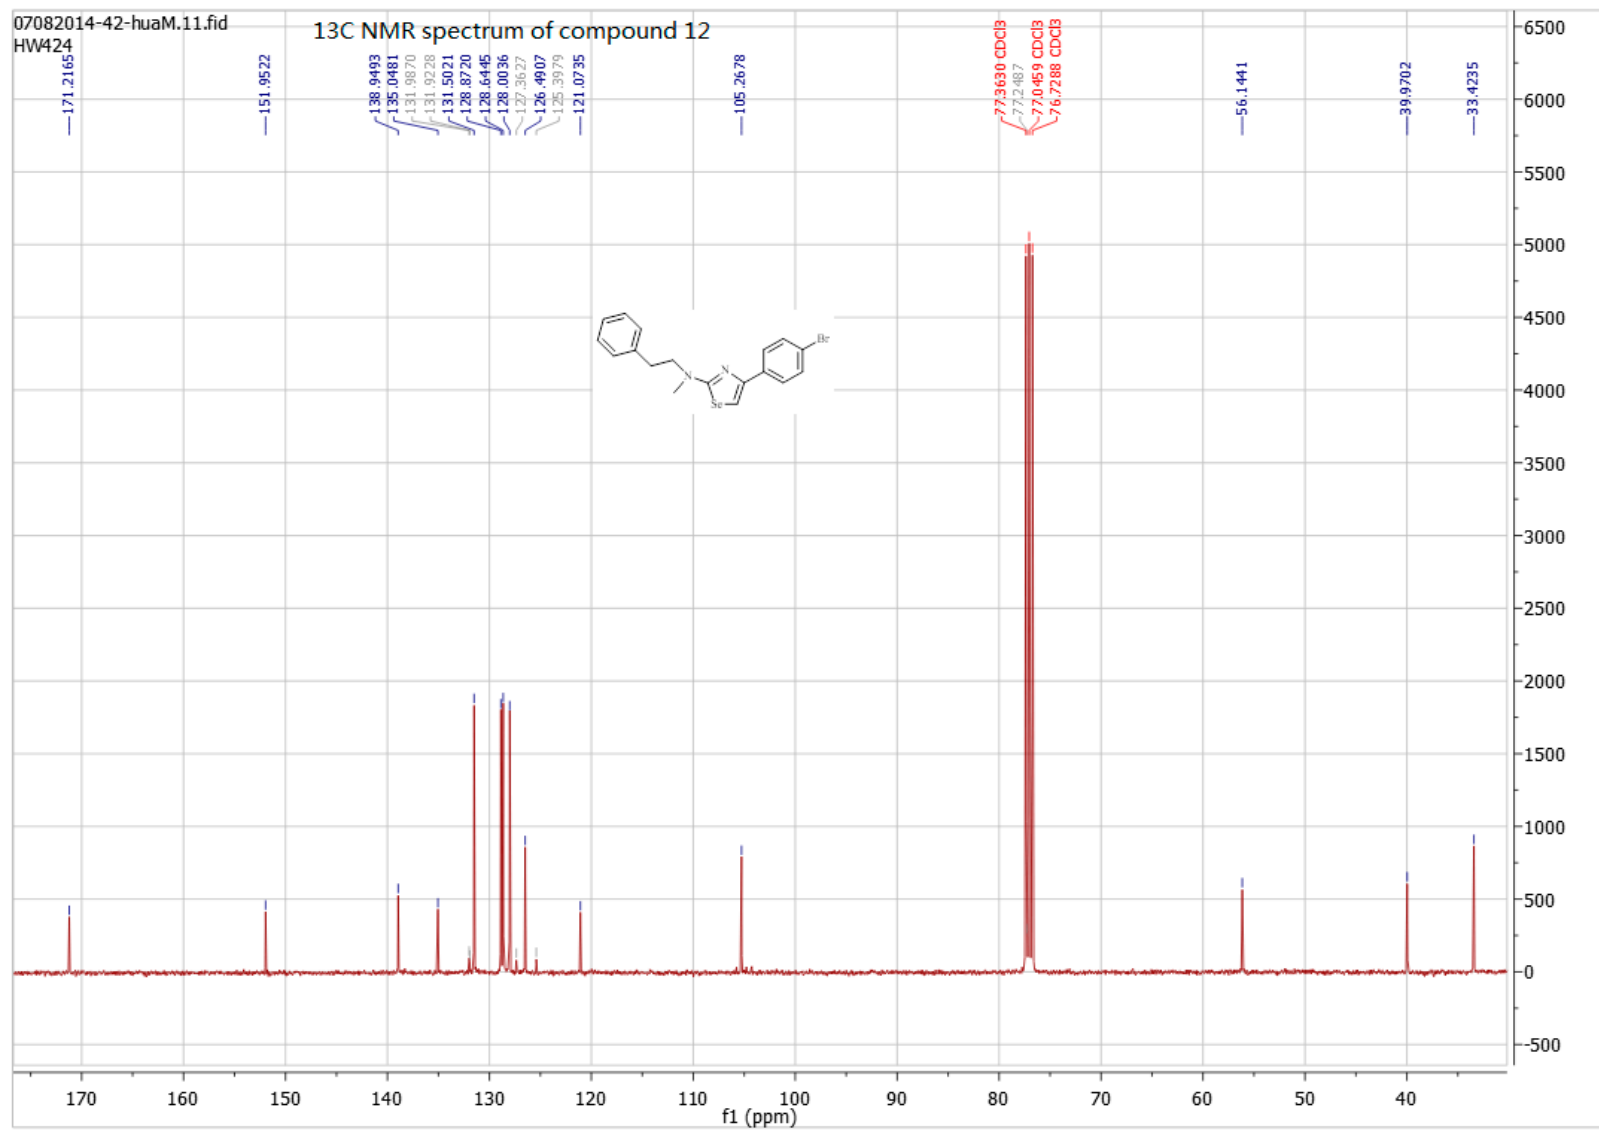



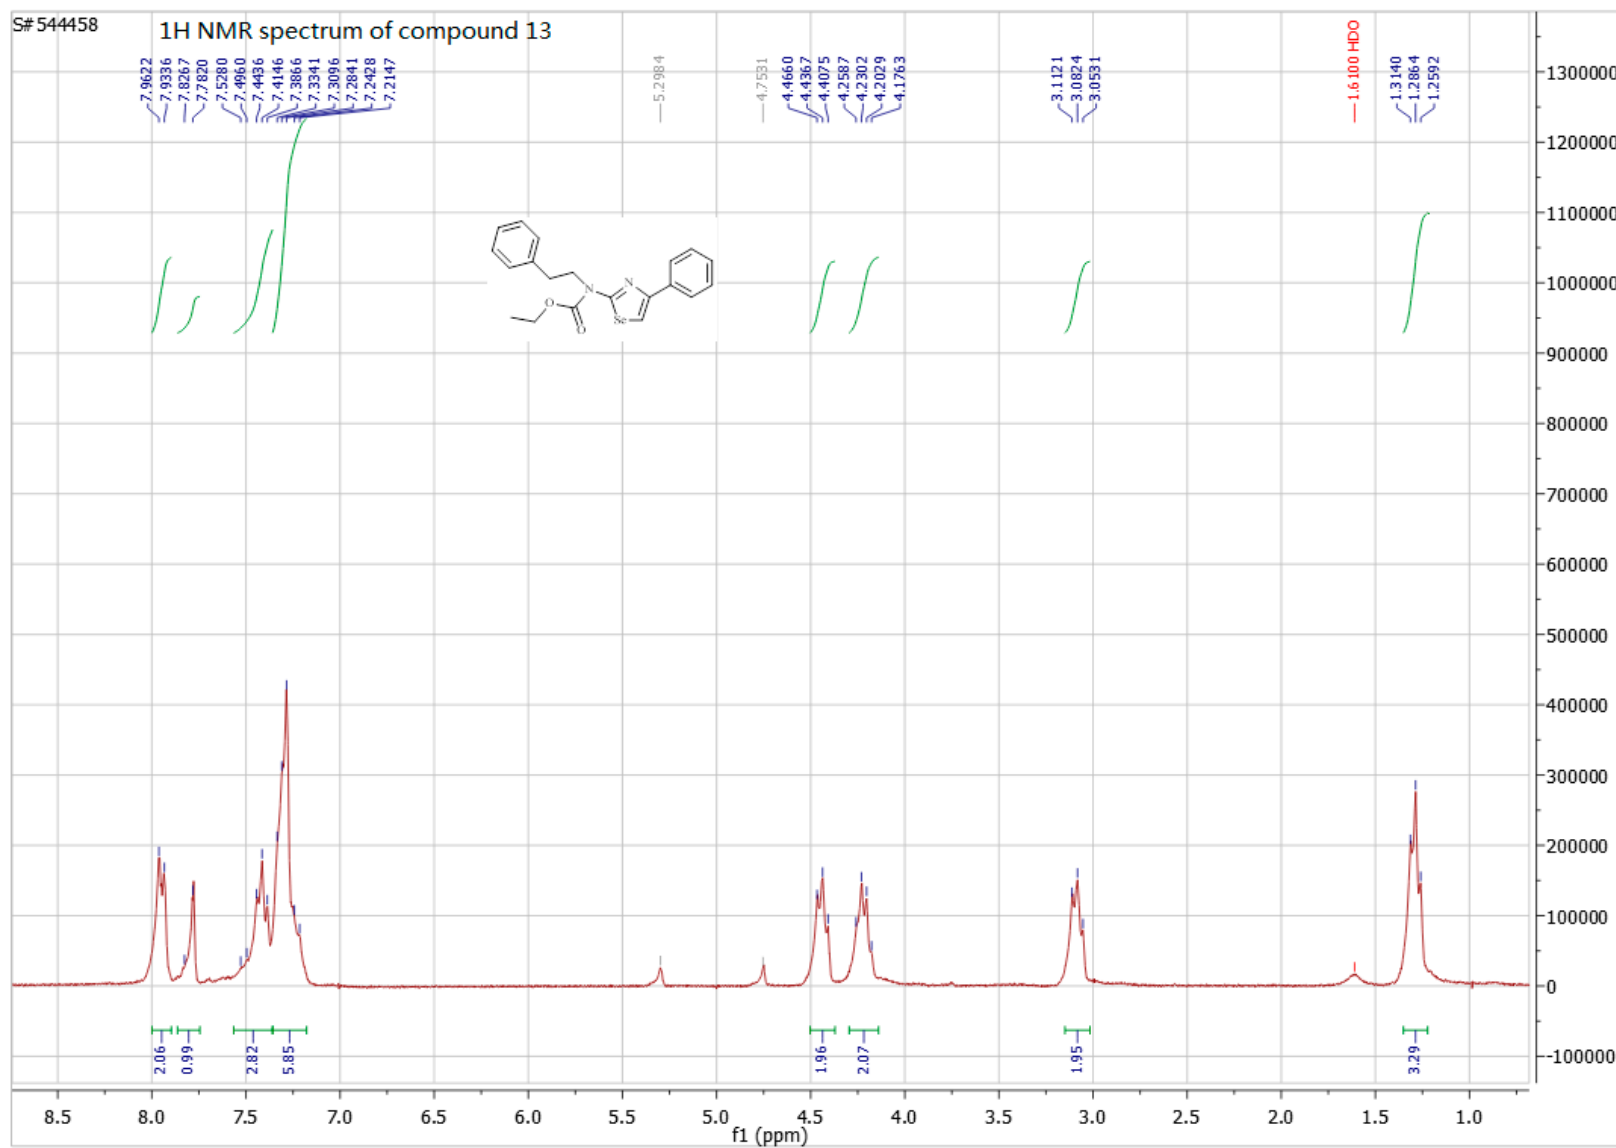

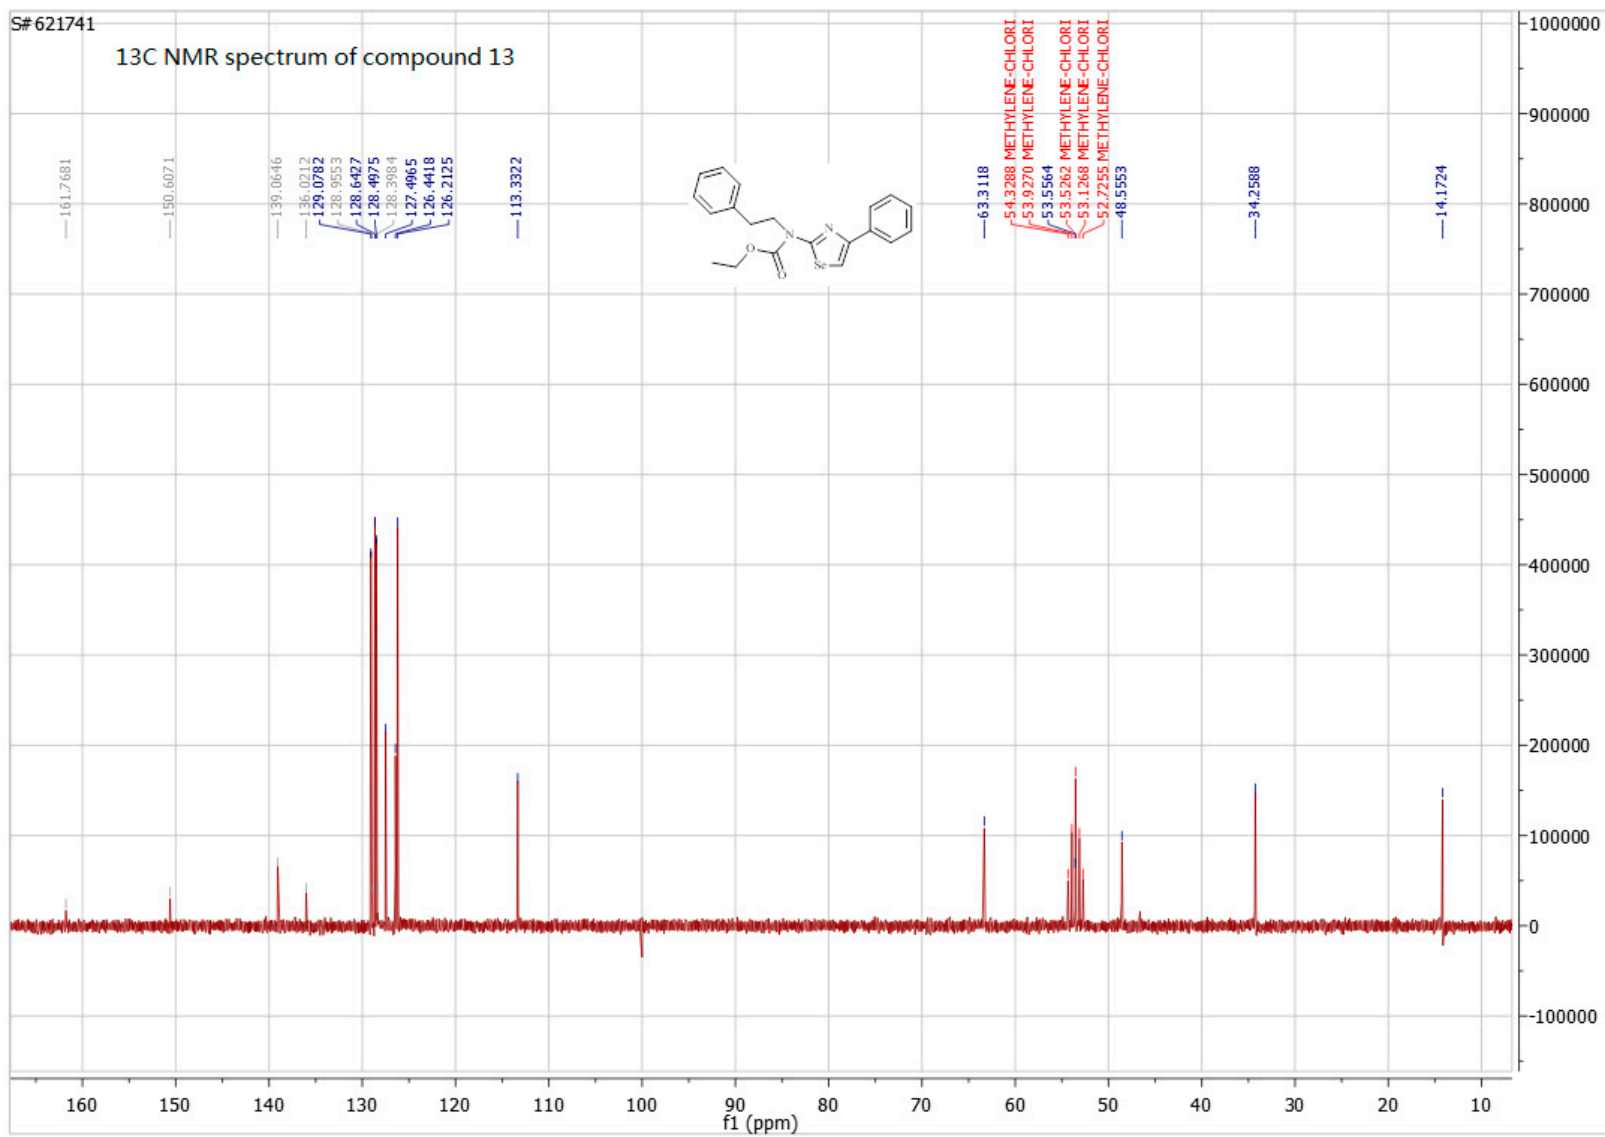

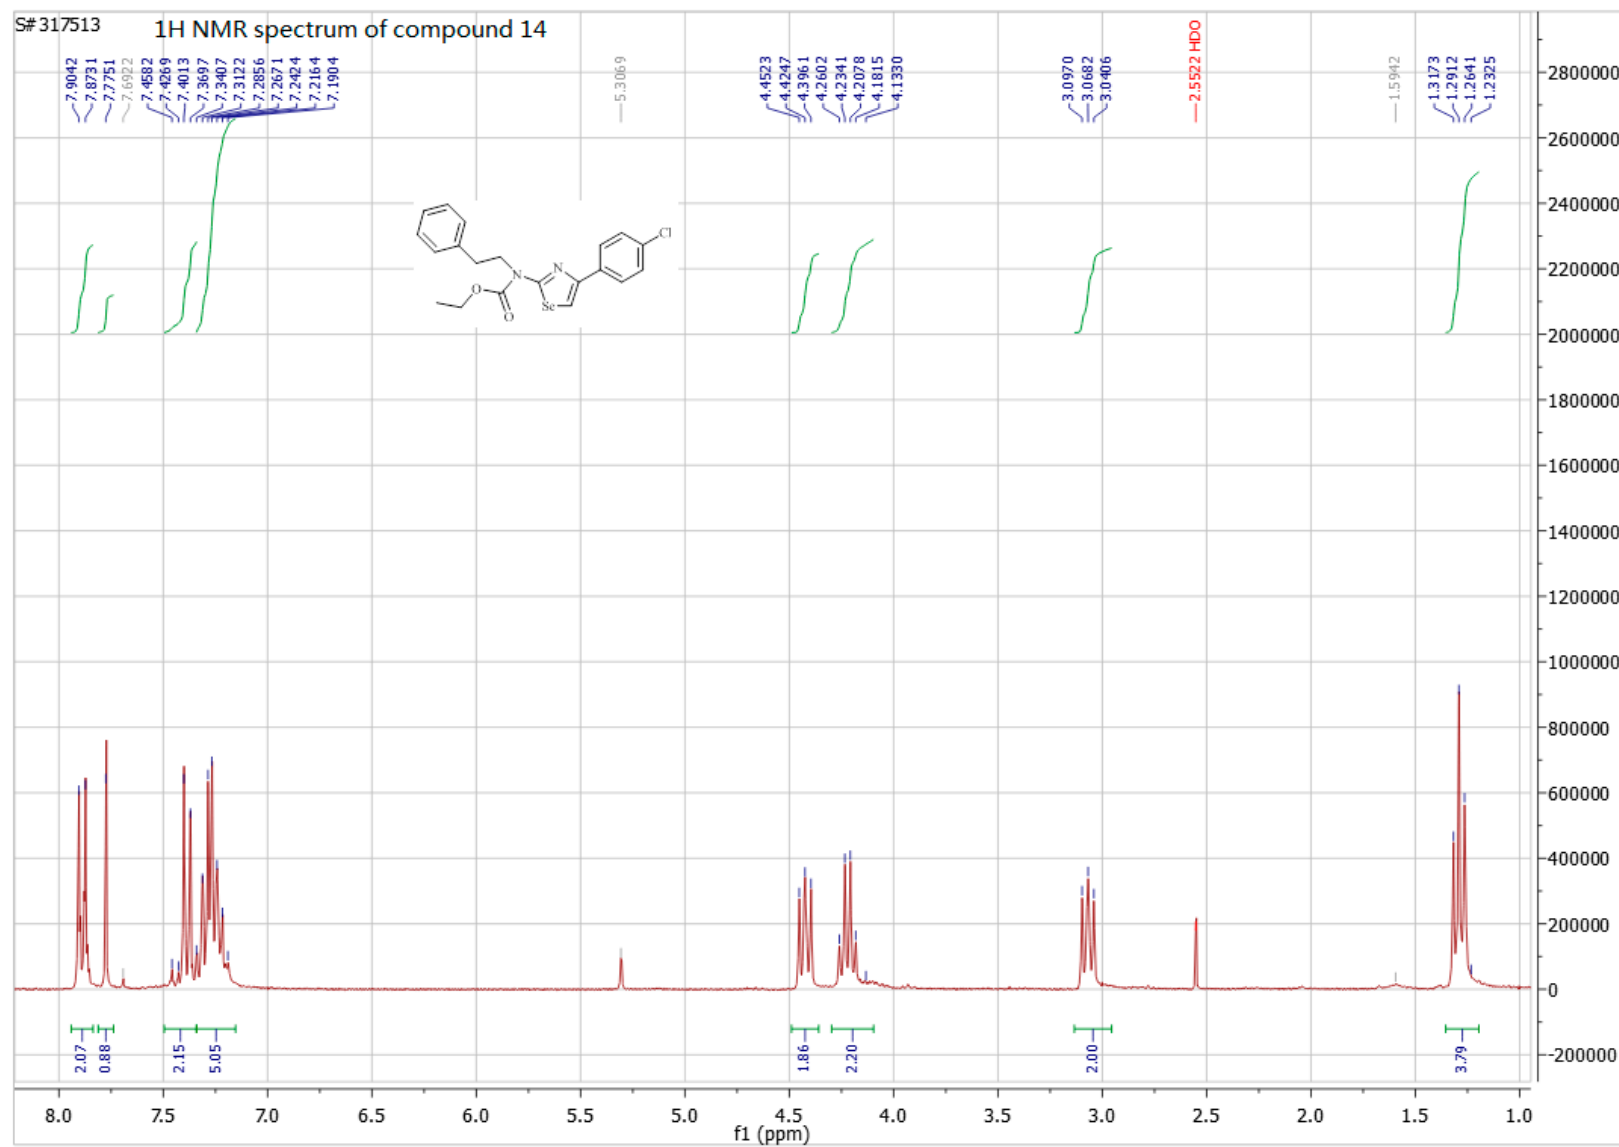

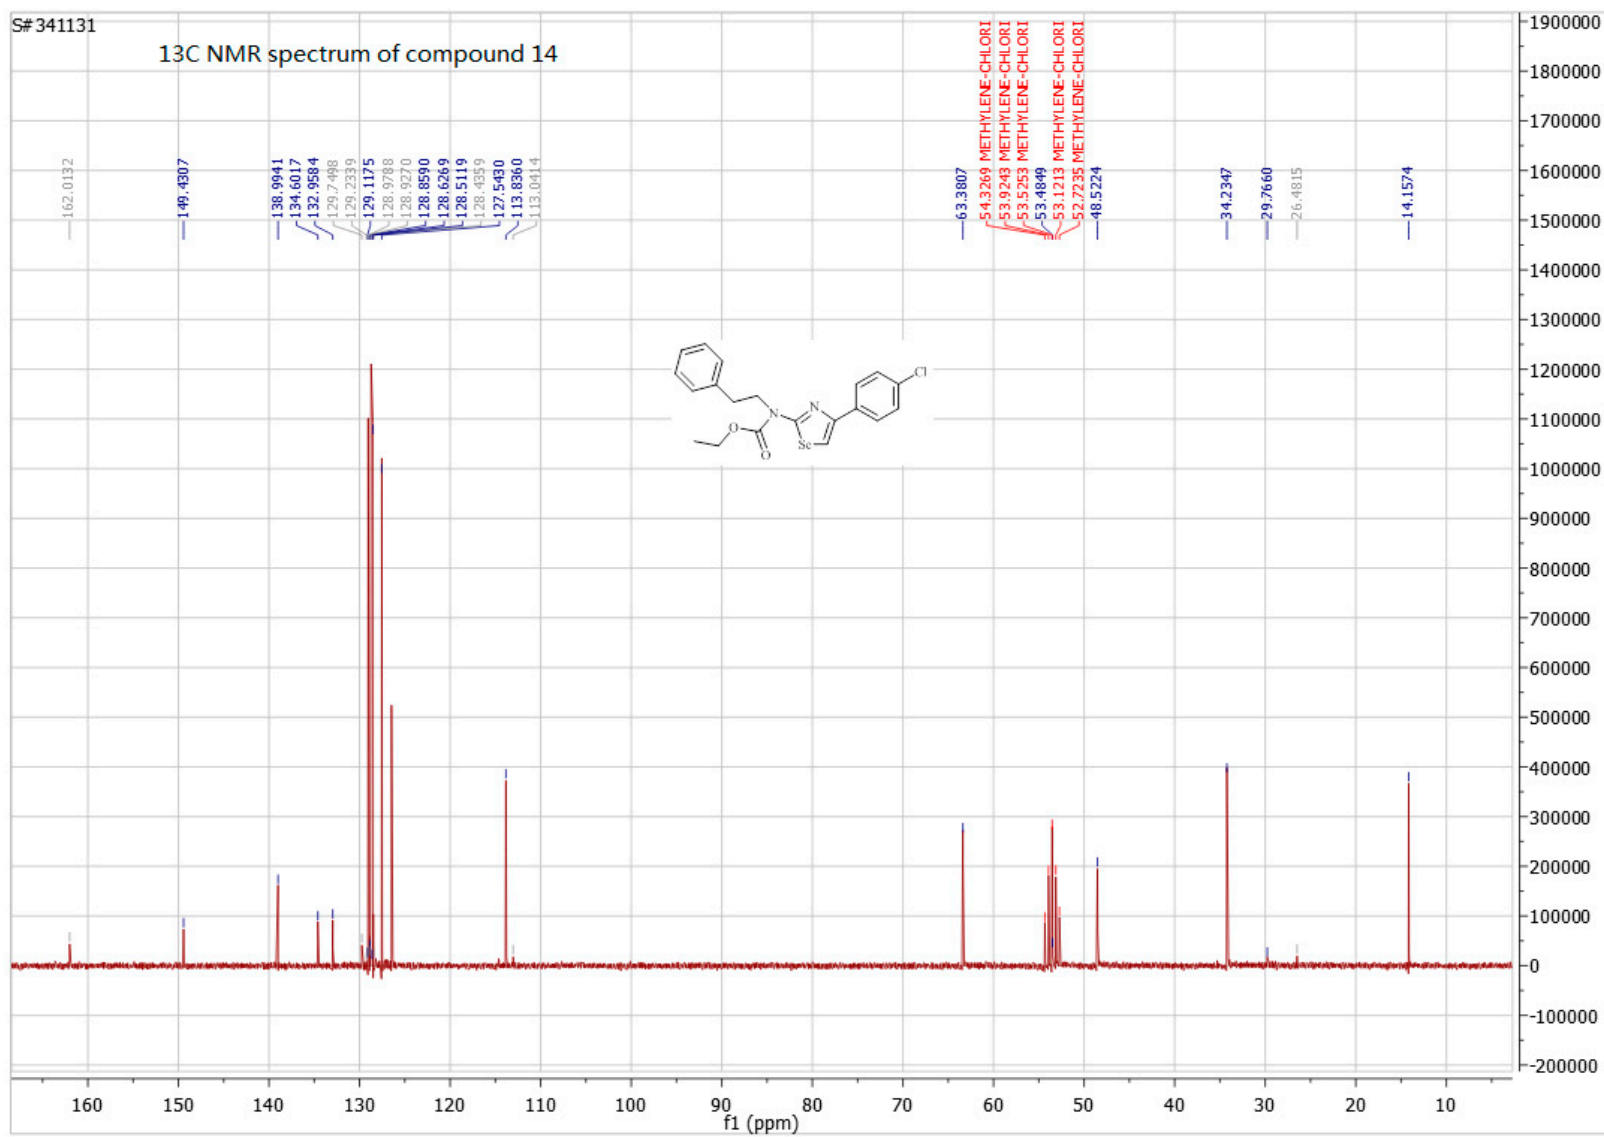

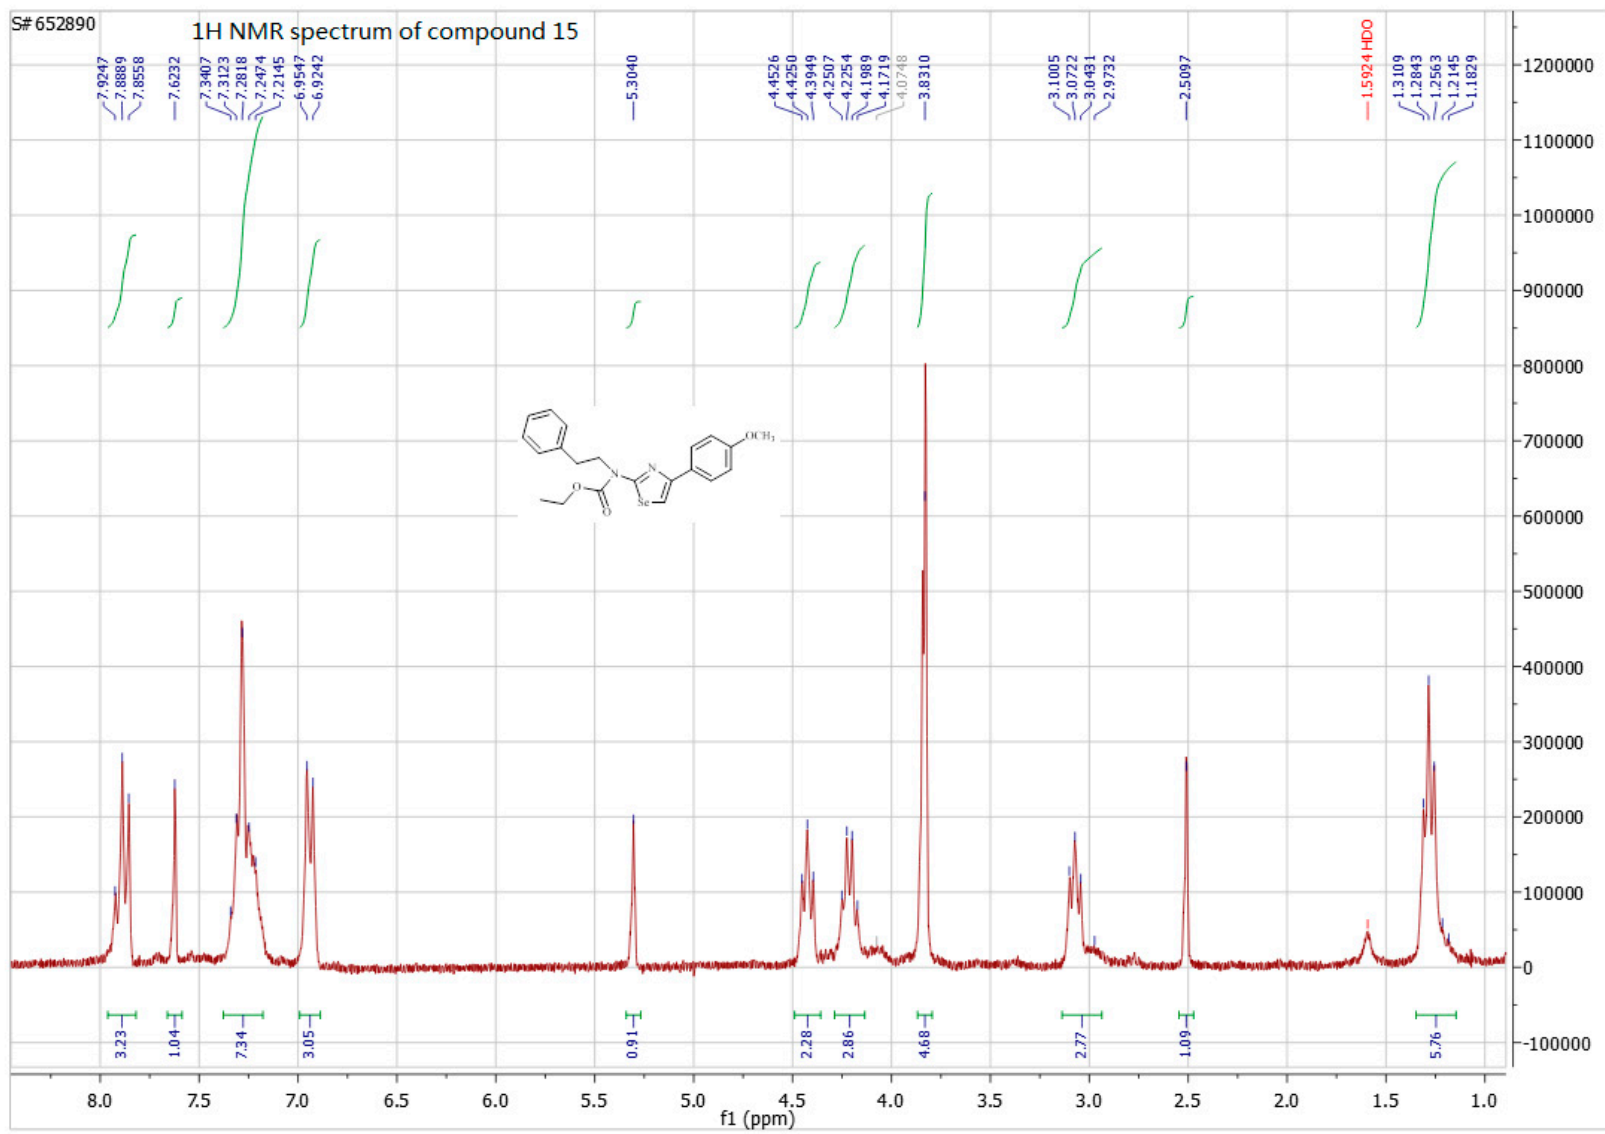

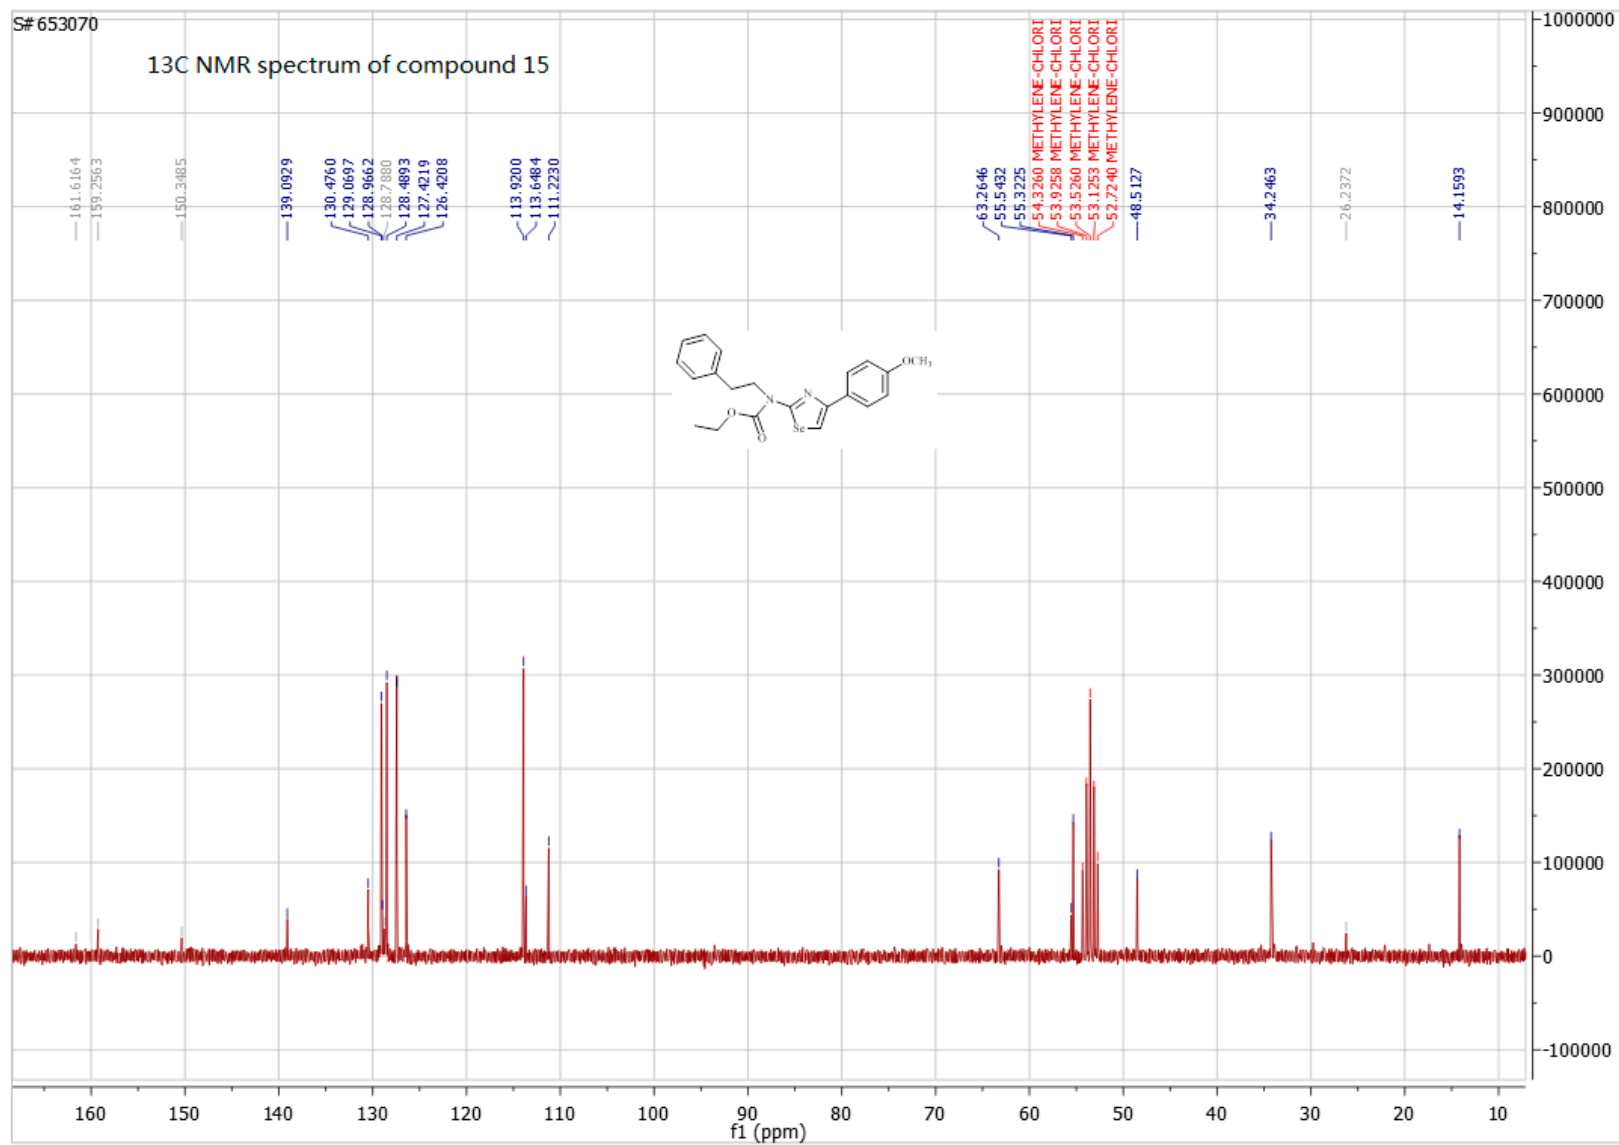

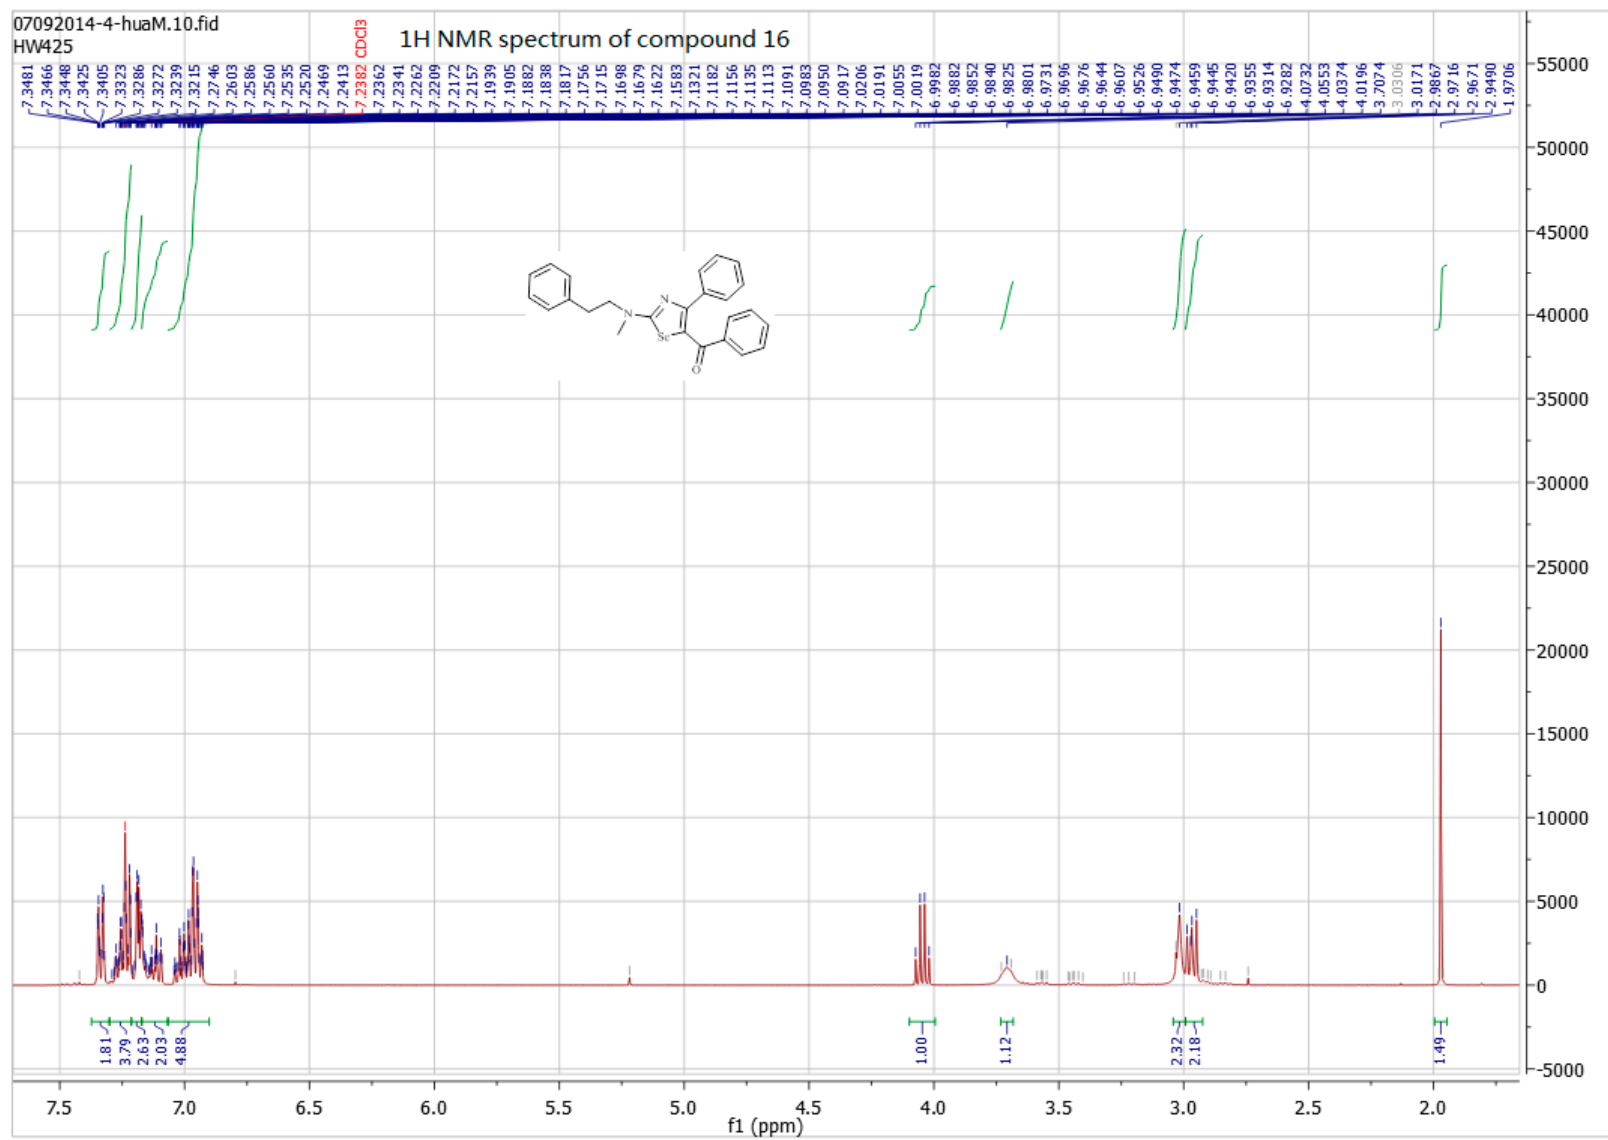

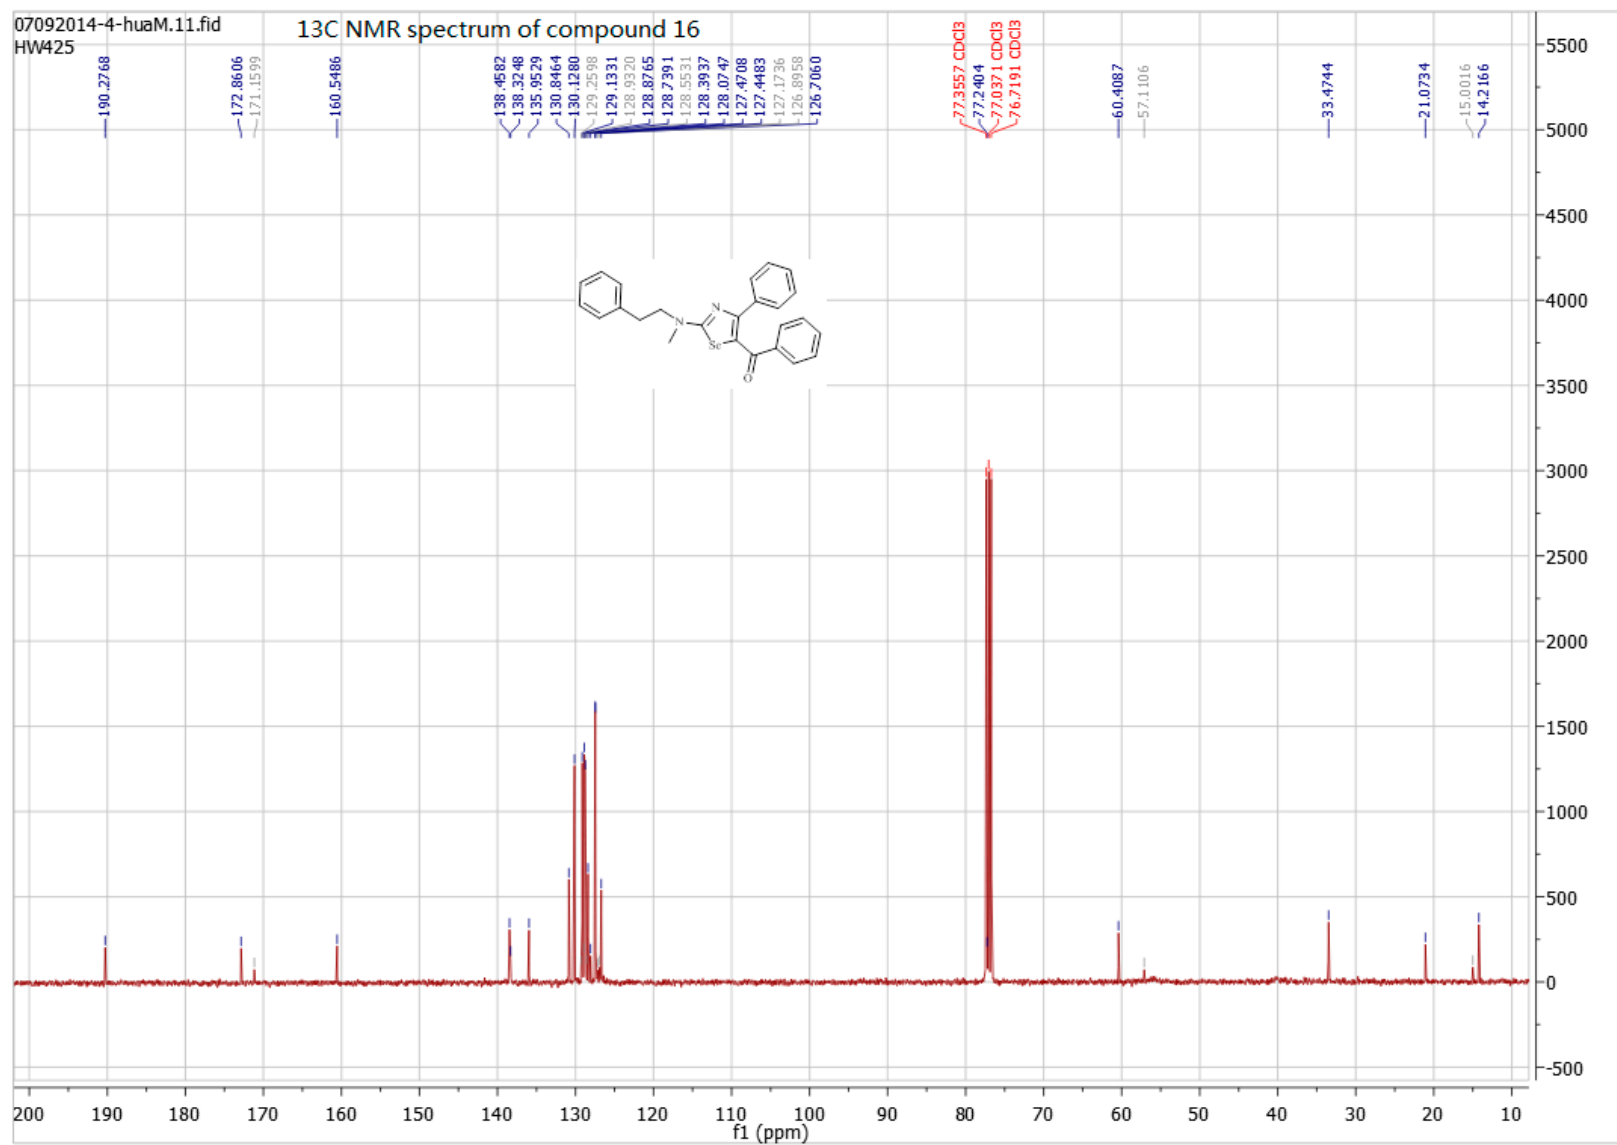

Supplement: molecules-22-00046-s001.pdf [file molecules-22-00046-s001.pdf]
